# Supplementary material for: Comparative effectiveness of first-line biological monotherapy use in rheumatoid arthritis: a retrospective analysis of the RECord-linkage On Rheumatic Diseases study on health care administrative databases
Source: PubMed Central journal article supplement — BMJ Open. 2018 Sep 11;8(9):e021447. doi: 10.1136/bmjopen-2017-021447 (PMC6144331; doi:10.1136/bmjopen-2017-021447), 2018-09-11
Supplement: bmjopen-2017-021447.draft_revisions.pdf [file bmjopen-2017-021447.draft_revisions.pdf]

# BMJ Open

BMJ Open is committed to open peer review. As part of this commitment we make the peer review history of every article we publish publicly available.

When an article is published we post the peer reviewers' comments and the authors' responses online. We also post the versions of the paper that were used during peer review. These are the versions that the peer review comments apply to.

The versions of the paper that follow are the versions that were submitted during the peer review process. They are not the versions of record or the final published versions. They should not be cited or distributed as the published version of this manuscript.

BMJ Open is an open access journal and the full, final, typeset and author-corrected version of record of the manuscript is available on our site with no access controls, subscription charges or pay-per-view fees (<http://bmjopen.bmj.com>).

If you have any questions on BMJ Open's open peer review process please email [info.bmjopen@bmj.com](mailto:info.bmjopen@bmj.com)

# BMJ Open

## Comparative effectiveness of first-line biologic monotherapy use in rheumatoid arthritis. RECORe-linkage On Rheumatic Disease study on health care administrative databases.

|                               |                                                                                                                                                                                                                                                                                                                                                                                                                                                                                                                                                                                                            |
|-------------------------------|------------------------------------------------------------------------------------------------------------------------------------------------------------------------------------------------------------------------------------------------------------------------------------------------------------------------------------------------------------------------------------------------------------------------------------------------------------------------------------------------------------------------------------------------------------------------------------------------------------|
| Journal:                      | <i>BMJ Open</i>                                                                                                                                                                                                                                                                                                                                                                                                                                                                                                                                                                                            |
| Manuscript ID                 | bmjopen-2017-021447                                                                                                                                                                                                                                                                                                                                                                                                                                                                                                                                                                                        |
| Article Type:                 | Research                                                                                                                                                                                                                                                                                                                                                                                                                                                                                                                                                                                                   |
| Date Submitted by the Author: | 29-Dec-2017                                                                                                                                                                                                                                                                                                                                                                                                                                                                                                                                                                                                |
| Complete List of Authors:     | Silvagni, Ettore; Department of Medical Sciences, Rheumatology Unit, University of Ferrara<br>Bortoluzzi, Alessandra; Department of Medical Sciences, Rheumatology Unit, University of Ferrara<br>Carrara, Greta; Italian Society for Rheumatology (SIR), Epidemiology Unit<br>Zanetti, Anna; Italian Society for Rheumatology (SIR), Epidemiology Unit<br>Govoni, Marcello; Department of Medical Sciences, Rheumatology Unit, University of Ferrara<br>Scirè, Carlo; Department of Medical Sciences, Rheumatology Unit, University of Ferrara; Italian Society for Rheumatology (SIR), Epidemiology Unit |
| Keywords:                     | rheumatoid arthritis, biologics, drug persistence, conventional synthetic DMARDs                                                                                                                                                                                                                                                                                                                                                                                                                                                                                                                           |
|                               |                                                                                                                                                                                                                                                                                                                                                                                                                                                                                                                                                                                                            |

SCHOLARONE™  
Manuscripts

only

1  
2  
3 **Research Article**  
4  
5

6 **Title**  
7

8 **Comparative effectiveness of first-line biologic monotherapy use in rheumatoid arthritis.**

9  
10 **RECORD-linkage On Rheumatic Disease study on health care administrative databases.**

11  
12 **E. Silvagni (MD)<sup>1</sup>, A. Bortoluzzi (MD, PhD)<sup>1</sup>, G. Carrara (Stat)<sup>2</sup>, A. Zanetti (Stat)<sup>2</sup>, M. Govoni**  
13  
14 **(MD)<sup>1</sup>, C.A. Scirè (MD, PhD)<sup>1,2</sup>**  
15

16  
17  
18 Ettore Silvagni (MD), Alessandra Bortoluzzi (MD, PhD), Greta Carrara (Stat), Anna Zanetti (Stat),  
19  
20 Marcello Govoni (MD), Carlo Alberto Scirè (MD, PhD)  
21

22  
23 *1: Department of Medical Sciences, Rheumatology Unit, University of Ferrara, Cona (Ferrara), Italy.*  
24

25  
26 *2: Epidemiology Unit, Italian Society for Rheumatology, Milan, Italy.*  
27  
28

29  
30  
31  
32  
33 **Corresponding author:** Carlo Alberto Scirè, Rheumatology Unit, Department of Medical Sciences,  
34  
35 University of Ferrara, S. Anna Hospital, via A. Moro 8, 44124 Cona (FE), Italy. Telephone: +39-  
36  
37 053223 9097. FAX number: +39-0532 239689.  
38

39  
40 **E-mail of the corresponding author:** [scrll@unife.it](mailto:scrll@unife.it); [c.scire@reumatologia.it](mailto:c.scire@reumatologia.it)  
41  
42  
43  
44  
45  
46  
47  
48  
49  
50  
51  
52  
53  
54  
55  
56  
57  
58  
59  
60

## Abstract

### Objective

These analyses aim to comparatively evaluate the persistence on treatment of different biological disease-modifying antirheumatic drugs (bDMARDs) when administered in monotherapy compared to combination with conventional synthetic (cs)DMARDs in rheumatoid arthritis (RA) patients receiving first-line biologics.

### Design

This is a retrospective observational study on Administrative Healthcare Databases.

### Methods

Data were extracted from healthcare databases of the Lombardy Region, Italy (2004-2013), as a part of the RECORD-linkage On Rheumatic Diseases (RECORD) study, on behalf of the Italian Society for Rheumatology (SIR). Analyses included RA patients starting first-line approved course of bDMARDs and evaluated drug survival by using Cox proportional hazard models. Results are presented as hazard ratios (HR) and 95%CI, crude and adjusted for pre-specified confounders (age, sex, disease duration, Charlson Comorbidity Index (CCI), previous infections, use of concomitant glucocorticoids or NSAIDs).

### Results

4478 RA patients were included (17.84% monotherapy). bDMARD monotherapy was associated with longer disease duration, higher CCI, lower glucocorticoids and NSAIDs use. Compared to monotherapy, combination associated with a lower risk of failure (adjusted HR 0.79, 95%CI 0.72-0.88). Among monotherapies, considering etanercept as reference, adalimumab (1.28, 1.03-1.59) and infliximab (2.41, 1.85-3.15) had higher risk of failure. Concomitant methotrexate (0.78, 0.70-0.87), leflunomide (0.80, 0.65-0.98), or csDMARD combinations (0.77, 0.68-0.87) reduced the risk of bDMARD withdrawal.

## Conclusion

Adalimumab and infliximab monotherapies show lower retention rate compared with etanercept. Concomitant methotrexate, leflunomide and csDMARD combination associate with longer survival on bDMARD. Our data confirm the effectiveness of the current practices in the choice of etanercept as first line anti-TNF monotherapy and strengthen the currently recommended use of bDMARDs in combination with csDMARDs.

### Strengths and limitations of this study

- This study provides results from administrative databases, following a previous study with the complete validation of classification algorithms for the identification of patients with rheumatoid arthritis (RA) at the population level through healthcare administrative databases.

- This study, as expected by study design, has no loss to follow up and allows the analysis of a large sample of patients.

- Limitations of the RECORD study include the absence of specific disease clinical outcomes, in particular no information are available about disease activity and radiographic progression.

## Introduction

Biological disease modifying antirheumatic drugs (bDMARDs) are recommended in association with non-biological (conventional synthetic) disease-modifying drugs (csDMARDs) in the treatment of rheumatoid arthritis (RA). As stated by recent updated 2016 EULAR recommendations for the management of RA[1], bDMARDs should be combined with a csDMARD because of a superior efficacy of combination therapy. Recommendations suggest using tocilizumab (TCZ) or a novel targeted synthetic molecule (tsDMARD) as tofacitinib or baricitinib when combination is not possible. Not only methotrexate (MTX) is useful in combination therapy, but other csDMARDs can be also considered.

The better performance of bDMARD combination therapy with csDMARDs over bDMARD monotherapy has been clearly established both in terms of efficacy and retention rate. A recent meta-analysis of the Hazard Ratios (HRs) of bDMARDs discontinuation shows a 23% lower risk of drug withdrawal for any cause in patients treated also with csDMARDs[2]. A possible pharmacodynamic explanation is linked to an additive effect in the inhibitory profile of the combined drugs. In particular, differences between biologics exist and MTX plus adalimumab (ADA) inhibits more biological pathways compared to MTX plus TCZ, suggesting a synergistic effect of MTX in immunosuppression which differs across drugs[3]. A pharmacokinetic effect of incremental doses of MTX in enhancing serum concentrations of ADA was also observed[4]. Moreover, the immunogenicity of biologics, in terms of occurrence of anti-drug antibodies, is lower in combination therapy and MTX reduces the incidence of the appearance of such antibodies[5,6]. The effect of csDMARDs other than MTX in reducing immunogenicity of TNF-inhibitors (TNFi) is still unknown. TCZ and etanercept (ETA) share low immunogenicity[7,8]; MTX association did not influence the production of anti-TCZ[9] and anti-abatacept (ABA) autoantibodies and, when autoantibodies occur, they are not associated with adverse events or

1  
2  
3 discontinuation of therapy[10]. Reduction in disability and radiographic progression are also  
4  
5 superior in combination regimens[11].  
6  
7

8 Limited data are available about the best biological treatment choice in real-life when a biologic  
9  
10 monotherapy is necessary for biologic-naïve patients. In clinical practice, contraindications to MTX  
11  
12 or early intolerance to csDMARDs are frequently observed, and clinicians need to start a biologic  
13  
14 monotherapy in these cases; the result is that RA patients are treated with monotherapy nearby in  
15  
16 one third or even more cases[12–16].  
17  
18

19  
20 Differently from randomized controlled trials (RCTs), data from observational studies or registries  
21  
22 explore the utilization of monotherapy in real-life clinical practice[2] and persistence in therapy is  
23  
24 considered a good indirect and composite measure of effectiveness, safety and tolerability,  
25  
26 reflecting the long-term impact on the course of the disease. Data of real-life overall persistence  
27  
28 show that monoclonal TNFi are burdened by a higher risk of drug failure compared to ETA[2].  
29  
30

31 Limited data are available for non-TNFi.  
32  
33

34  
35 Objective of this analysis was to assess, in RA patients receiving first-line approved biological  
36  
37 therapy, the comparative effectiveness (expressed in terms of drug survival) of different bDMARDs  
38  
39 when administered in monotherapy compared with combination therapy, accordingly to real-life  
40  
41 clinical practice and in compliance with local regulatory approvals. Secondary objectives were to  
42  
43 characterize features of patients starting monotherapy and to evaluate the specific effect of MTX  
44  
45 combination therapy compared with other csDMARDs association regimens in determining  
46  
47 persistence of bDMARD co-therapy.  
48  
49

50  
51 To answer these questions, we took advantage by the RECORD-linkage On Rheumatic Diseases  
52  
53 (RECORD) dataset, including data from administrative health database (AHD) of the Lombardy  
54  
55  
56  
57  
58  
59  
60



1  
2  
3  
4  
5  
6  
7  
8  
9  
10  
11  
12  
13  
14  
15  
16  
17  
18  
19  
20  
21  
22  
23  
24  
25  
26  
27  
28  
29  
30  
31  
32  
33  
34  
35  
36  
37  
38  
39  
40  
41  
42  
43  
44  
45  
46  
47  
48  
49  
50  
51  
52  
53  
54  
55  
56  
57  
58  
59  
60

region (Italy), analysing bDMARDs and concurrent drug exposures of all the first courses of bDMARDs of RA patients between 2004 and 2013.

For peer review only

## Materials and Methods

### *Study Design and Setting*

This is a retrospective observational study on AHD of Lombardy Region, Italy (>10,000,000 inhabitants). Access to data was granted by the General Directorate of Health for the purpose of the RECORD study, a project promoted by the Italian Society for Rheumatology (SIR) aiming to set up a national surveillance system to monitor the health burden of rheumatic diseases in Italy using AHD. The protocol was approved by the ethical committee of the Pavia University Hospital. Data included were retrieved between 1st of January 2004 and 31st of December 2013.

### *Participants and variables*

The design of the RECORD study includes a database population of patients with RA and 4 age and sex-matched controls from the general population. Patients with RA were identified through co-payment exemption code 006.714.0, based on its previously demonstrated high specificity (96.39%) and high sensitivity (77.08%) for RA[17], in line with other studies following a similar methodology[18,19].

Study population was defined among patients with RA and at least one delivery of first-line approved bDMARDs (abatacept (ABA), adalimumab (ADA), certolizumab (CTZ), etanercept (ETA), golimumab (GOL), infliximab (INF) and tocilizumab (TCZ)). Rituximab (RTX) was excluded due to the local limitation in first-line deliverability of this drug in RA patients. The exposure to non-steroidal anti-inflammatory drugs (NSAIDs), daily mean glucocorticoid (GC) dosage (expressed in terms of prednisone equivalent, mg per day) and to specific csDMARDs (MTX, Leflunomide (LFN), Cyclosporine A (CYA), Hydroxychloroquine (HCQ) or Sulphasalazine (SSZ)) was defined by the drug delivery recorded in the administrative database.

1  
2  
3 Data included demographics (birth date, gender, death date or embarkment, drug delivery  
4 (Anatomic-Therapeutic Chemical – ATC) - code, date of drug delivery, quantity), exemptions  
5 (exemption code, date of exemption), outpatient services (code and date) and hospital discharge  
6 forms (HDF) including information on beginning and end of hospitalization, International  
7 Classification of Disease, 9th revision, Clinical Modification (ICD-9-CM) diagnoses and Disease  
8 Related Group – DRG. Previous bacterial infections were considered if hospitalization for bacterial  
9 infection or an antibiotic treatment course of over 14 days occurred in the previous year[20].  
10  
11  
12  
13  
14  
15  
16  
17  
18

### 19 ***Statistical methods***

20  
21  
22 The primary outcome was persistence with first-line bDMARD, which was defined as the length of  
23 time between drug delivery plus drug coverage. A patient was considered exposed to a specific  
24 treatment from the first prescription of drug until the last one plus 6 months, in order to consider  
25 the coverage period of drug also after its withdrawal, or until the first prescription of the  
26 subsequent drug. Censoring was defined at treatment stop date plus drug coverage or until the  
27 start of a new bDMARD, death or at the end of established follow-up, whichever came first. Drug  
28 persistence in bDMARD therapy was compared using Cox proportional Hazard models. Results  
29 were presented as HR and 95%CI, crude and adjusted for pre-specified confounders (sex, age,  
30 disease duration, Charlson Comorbidity Index (CCI)[21], concomitant use of NSAIDs, GCs average  
31 dosage and previous bacterial infections). A secondary analysis, focused on the role of each  
32 associated csDMARD in bDMARD persistence, was analyzed by the same mechanism (firstly  
33 considering combination biologics as a whole and then investigating the interaction between  
34 different csDMARDs and each bDMARD). A sensitivity analysis was performed to investigate if  
35 different periods of bDMARDs prescription could have influenced persistence data (a distinction  
36 was made before and after 31<sup>st</sup> December 2009, according to changes occurred in local bDMARDs  
37 deliverability).  
38  
39  
40  
41  
42  
43  
44  
45  
46  
47  
48  
49  
50  
51  
52  
53  
54  
55  
56  
57  
58  
59  
60

1  
2  
3 All the analyses were performed using the Stata11 software (STATA Corporation, College Station,  
4  
5 Texas, USA) and R statistical Software (Foundation for Statistical Computing, Vienna, Austria).  
6  
7  
8  
9  
10  
11  
12  
13  
14  
15  
16  
17  
18  
19  
20  
21  
22  
23  
24  
25  
26  
27  
28  
29  
30  
31  
32  
33  
34  
35  
36  
37  
38  
39  
40  
41  
42  
43  
44  
45  
46  
47  
48  
49  
50  
51  
52  
53  
54  
55  
56  
57  
58  
59  
60

## Results

### *Study population and Descriptive Data*

A total of 4478 RA patients who had their first-line bDMARD delivery were included (13728 person/time). 3472 were women (77.53 %); mean age (standard deviation, SD) at bDMARD exposure was 55.48 (12.69) years with a modal disease duration of over five years. No missing data nor lost to follow-up were recorded, nor expected by design. A mean (SD) CCI of 1.16 (0.48) was observed (Table 1).

bDMARD monotherapy was administered to 799 patients (17.84%) while 3679 (82.16%) experienced csDMARDs association. Most prescribed bDMARDs were ETA (1787 patients, 39.91%), ADA (1143, 25.52%) and INF (861, 19.23%). ETA was the most prescribed drug out of monotherapy (385 patients, 48.19%) and in combination group (1402 patients, 38.11%) (Table 2).

Among concomitant csDMARD therapy, MTX was the most commonly prescribed (2297 patients had only concurrent MTX, 62.44%); 223 only concurrent LFN (6.06%), 151 concurrent HCQ (4.10%), 43 SSZ (1.17%), 41 CYA (1.11%). 924 patients (25.12%) experienced a combination of different csDMARDs; in this group a total of 827 patients received MTX, 254 LFN, 131 SSZ, 619 HCQ, 116 CYA.

451 bDMARD monotherapies were started before 31<sup>st</sup> December 2009 (252 ETA, 136 ADA, 62 INF, 1 ABA, no TCZ, CTZ and GOL) and 348 after 1<sup>st</sup> January 2010 (133 ETA, 65 ADA, 47 TCZ, 33 ABA, 30 CTZ, 21 GOL and 19 INF).

### *Factors influencing monotherapy*

Monotherapy was associated with longer disease duration, a higher CCI (in particular hepatic and renal disease and heart failure), lower use of GCs and NSAIDs (Table 1).

**Table 1. Clinical and demographic features of the study population including 4478 RA patients and their distribution in bDMARDs mono- and combination therapy.**

| <i>Demographic characteristics</i>      | <i>Study population</i> | <i>Monotherapy (N. 799)</i> | <i>Combination (N 3679)</i> | <i>p</i> |
|-----------------------------------------|-------------------------|-----------------------------|-----------------------------|----------|
| Mean age (SD, years)                    | 55.48 (12.69)           | 54.90 (12.97)               | 55.61 (12.62)               | 0.136    |
| Female, n (%)                           | 3472 (77.53)            | 614 (76.85)                 | 2858 (77.68)                | 0.607    |
| <b>Clinical characteristics</b>         |                         |                             |                             |          |
| Disease duration N (%)                  |                         |                             |                             |          |
| • < 1 years                             | 1028 (22.96)            | 153 (19.15)                 | 875 (23.78)                 |          |
| • > 1 to ≤ 2 years                      | 1106 (24.7)             | 188 (23.53)                 | 918 (24.95)                 | <0.001   |
| • ≥ 3 to ≤ 5 years                      | 1064 (23.76)            | 171 (21.40)                 | 893 (24.27)                 |          |
| • > 5 years                             | 1280 (28.58)            | 287 (35.92)                 | 993 (26.99)                 |          |
| Number of comorbidities = 0 N (%)       | 3941 (88.01)            | 683 (85.48)                 | 3258 (88.56)                |          |
| Number of comorbidities = 1 N (%)       | 416 (9.29)              | 80 (10.01)                  | 336 (9.13)                  | 0.004    |
| Number of comorbidities = 2 N (%)       | 105 (2.34)              | 30 (3.75)                   | 75 (2.04)                   |          |
| Number of comorbidities ≥ 3 N (%)       | 16 (0.36)               | 6 (0.75)                    | 10 (0.27)                   |          |
| Charlson Comorbidity Index *, Mean (SD) | 1.16 (0.48)             | 1.22 (0.60)                 | 1.15 (0.45)                 | 0.009    |
| CHD, N (%)                              | 66 (1.47)               | 16 (2.00)                   | 50 (1.36)                   | 0.193    |
| Heart Failure, N (%)                    | 12 (0.27)               | 5 (0.63)                    | 7 (0.19)                    | 0.047    |
| Vascular Pathology, N (%)               | 10 (0.22)               | 4 (0.50)                    | 6 (0.16)                    | 0.086    |
| Dementia, N (%)                         | 1 (0.02)                | 1 (0.13)                    | 0 (0.00)                    | 0.178    |
| COPD, N (%)                             | 49 (1.09)               | 11 (1.38)                   | 38 (1.03)                   | 0.451    |
| Mild Hepatic disease **, N (%)          | 73 (1.63)               | 24 (3.00)                   | 49 (1.33)                   | 0.002    |
| Diabetes, N (%)                         | 276 (6.16)              | 41 (5.13)                   | 235 (6.39)                  | 0.195    |
| Renal Disease, N (%)                    | 32 (0.71)               | 18 (2.25)                   | 14 (0.38)                   | <0.001   |
| Neoplasm **, N (%)                      | 67 (1.50)               | 16 (2.00)                   | 51 (1.39)                   | 0.198    |
| Leukemia / Lymphoma, N (%)              | 1 (0.02)                | 1 (0.13)                    | 0 (0.00)                    | 0.178    |
| Previous Infections, N (%)              | 822 (18.36)             | 140 (17.52)                 | 682 (18.54)                 | 0.501    |
| Concomitant NSAIDs, N (%)               | 3386 (75.61)            | 485 (60.70)                 | 2901 (78.85)                | <0.001   |
| Concomitant GCs, N (%)                  | 3045 (68.00)            | 428 (53.57)                 | 2617 (71.13)                | <0.001   |
| GCs dose (mg/day), mean (SD)            | 2.23 (3.08)             | 1.85 (3.32)                 | 2.31 (3.01)                 | <0.001   |

CHD: Coronary Heart Disease; COPD: Chronic Obstructive Pulmonary Disease; AIDS: Acquired Immunodeficiency Syndrome.

\* Diabetes with end-organ damage, AIDS, cerebrovascular disease, peptic ulcer and hemiplegia are not shown due to absence of cases in monotherapy group.

\*\* Severe hepatic disease and metastatic neoplasms are not shown due to absence of cases in both groups.

**Table 2. Distribution of different bDMARDs in mono- and combination therapy with csDMARDs**

| <i>bDMARDs</i> | <i>Study population</i> | <i>Monotherapy (N. 799)</i> | <i>Combination (N 3679)</i> |
|----------------|-------------------------|-----------------------------|-----------------------------|
| ABA N (%)      | 189 (4.22)              | 34 (4.26)                   | 155 (4.21)                  |
| ADA N (%)      | 1143 (25.52)            | 201 (25.16)                 | 942 (25.60)                 |
| CTZ N (%)      | 156 (3.48)              | 30 (3.75)                   | 126 (3.42)                  |
| ETA N (%)      | 1787 (39.91)            | 385 (48.19)                 | 1402 (38.11)                |
| GOL N (%)      | 151 (3.37)              | 21 (2.63)                   | 130 (3.53)                  |
| INF N (%)      | 861 (19.23)             | 81 (10.14)                  | 780 (21.20)                 |
| TCZ N (%)      | 191 (4.27)              | 47 (5.88)                   | 144 (3.91)                  |

### ***Risk of bDMARD failure***

Compared to monotherapy, combination with at least one csDMARD was associated with a lower risk of drug failure (crude HR 0.77, 95%CI 0.69-0.85; adjusted HR 0.79, 95%CI 0.72-0.88). Among patients in bDMARD-monotherapy, considering ETA as reference, the adjusted HR for bDMARD failure was 1.28 for ADA (95%CI 1.03-1.59) and 2.41 for INF (95%CI 1.85-3.15) (Figure 1); ABA monotherapy was associated with a reduced - but not statistically significant - risk of failure, while TCZ was almost equal to ETA. Otherwise, among combination therapies, only INF was significantly inferior compared with ETA monotherapy. The risk of failure evaluated for the other bDMARDs was not statistically different from ETA monotherapy.

### ***Influence of different csDMARDs in persistence in bDMARD treatment***

Considering specific combination therapy and taking bDMARD monotherapy as reference, concurrent csDMARDs significantly reduced the risk of bDMARD withdrawal (adjusted HR 0.78 for MTX alone, 95%CI 0.70-0.87; HR 0.80 for LFN alone, 95%CI 0.65-0.98; HR 0.77 for combination of different csDMARDs, 95%CI 0.68-0.87) (Figure 2), while no statistical significant improvement in drug survival was observed for SSZ, HCQ or CYA when used as the single associated csDMARD.

The analysis of different csDMARDs in determining persistence of different bDMARD treatment showed that MTX alone or in combination with other csDMARDs positively influenced persistence in INF treatment, while other associations between csDMARDs and bDMARDs did not significantly modify the concomitant biologic drug survival.

### ***Sensitivity analysis***

After stratification in different periods of time (before and after 31<sup>st</sup> December 2009) an increase in the previous reported risk of drug failure for INF was observed (HR 2.72, 95%CI 1.51-4.90). The risk of ADA failure remains elevated compared to ETA monotherapy, but differences according to the time period were no longer significant (HR 1.17, 95%CI 0.70-1.96); the risk of failure for other



1  
2  
3 bDMARDs remains not significantly different from ETA (Supplementary file 1). A sub-analysis of  
4  
5 the patients receiving ADA monotherapy after 1<sup>st</sup> January 2010 showed that in this group a  
6  
7 proportional higher number of males was present ( $p=0.004$ ), with longer disease duration  
8  
9 ( $p<0.001$ ) and higher CCI ( $p=0.018$ ).  
10  
11  
12  
13  
14  
15  
16  
17  
18  
19  
20  
21  
22  
23  
24  
25  
26  
27  
28  
29  
30  
31  
32  
33  
34  
35  
36  
37  
38  
39  
40  
41  
42  
43  
44  
45  
46  
47  
48  
49  
50  
51  
52  
53  
54  
55  
56  
57  
58  
59  
60

## Discussion

Using bDMARDs as monotherapy in clinical settings is a common practice for RA patients and recognised by health authorities although current guidelines recommend combining them with csDMARDs. The aims of this study were to describe persistence and factors associated with starting biologic monotherapy in a real-world setting. In our study, monotherapy was common and observed in approximately 1 out of 5 biologic-naive patients with RA initiating a biologic agent (17.8%). In previous biologics registries and claims database studies, 12–39% of patients were taking biologics as monotherapy[22–24].

From a practical perspective, it seems even more important to investigate those factors which may drive prescribing monotherapy. Indeed, bDMARDs monotherapy could be representative of a subgroup of patients with a more difficult disease management[25]. It has been reported that older patients, with longer disease duration and multiple comorbidities, lower body mass index (BMI) and higher disease activity show higher probability to undergo monotherapy[16,22,25,26]. Concomitant use of glucocorticoids predicts higher bDMARD discontinuation, reflecting a much severe course of the disease[2,23]. Accordingly, in our retrospective study based on AHD, we have observed a significant association between monotherapy and longer disease duration and a higher number of comorbidities. As expected, hepatic and renal diseases were the most limiting factors for csDMARDs association. NSAIDs and GCs were negatively associated with monotherapy, likely reflecting contraindication to these drugs due to concomitant comorbidities.

As demonstrated by the majority of published real-life studies and RCTs, our study confirms that bDMARD risk of failure is significantly lower in combination with csDMARDs (21% lower risk of drug withdrawal compared to monotherapy). Concerning monotherapy, in a Swiss study of retention rate which analyses data from Swiss Clinical Quality Management Registry (SCQM-RA) between 2004 and 2013[25], 27% of all biologics therapeutic courses was initiated as

1  
2  
3 monotherapy (the higher percentage of monotherapy was for CTZ with 46%; 35% ETA; 35% TCZ;  
4  
5 29% ABA; 26% ADA; 23% RTX; 17% GOL and 14% INF) and a further 13% experienced a transient  
6  
7 phase of monotherapy overtime; discontinuation of bDMARD occurred in 63% (1545/2453) and  
8  
9 the adjusted HR for discontinuation of biologic monotherapy versus combination was 1.15 (95%CI  
10  
11 1.03-1.30,  $p=0.018$ ), although differences between the two groups were relatively modest.  
12  
13  
14 Treatment failure was influenced not only by the type of bDMARD but even by gender, number of  
15  
16 previous bDMARDs, year of initiation of the receiving drug, seropositivity, disease duration and  
17  
18 activity. TNFi strongly impact these data, being historically the first bDMARD entered in clinical  
19  
20 practice and accounting for about 80% of therapeutic courses; therefore, conclusive results are  
21  
22 still lacking. Overall, the type of bDMARD is certainly one of the most important factors influencing  
23  
24 persistence, and INF monotherapy is burdened by the higher rate of withdrawal[2,23,27]. Globally,  
25  
26 monoclonal antibodies against TNF-alfa share higher discontinuation compared to ETA[2,28];  
27  
28 whether the global higher immunogenicity of monoclonal antibodies is strictly responsible for this  
29  
30 difference is still matter of debate. In an observational study, Kristensen et al.[29] stand out a  
31  
32 higher adherence in first-line ETA-treated patients compared to INF; concomitant MTX was  
33  
34 associated with better persistence in both groups but significantly higher for ETA. In a 12-years  
35  
36 retention rate study of first-line TNFi, Favalli et al.[30] demonstrated a higher risk of drug failure  
37  
38 for ADA (HR 2.89, 95%CI 2.2-3.78) and INF (HR 2.56, 95%CI 1.92-3.4) compared to ETA, similarly to  
39  
40 what is reported by a French multicentric study by Frazier-Mironer[31] and the GISEA registry[32];  
41  
42 MTX-users in combination with biologic shared higher retention rate compared with TNFi  
43  
44 monotherapy (HR 1.48, 95%CI 1.18-1.86). Jorgensen et al.[23] analysed 775 pts in the Danish  
45  
46 registry and showed that persistence in monotherapy was significantly higher for all biologics  
47  
48 compared to INF (HR of withdrawal 2.53 for INF compared to other bDMARDs, 95%CI 1.70-3.77,  $p$   
49  
50  $<0.001$ ) and these features were independent of the number of previous biologics. In German  
51  
52 RABBIT registry, a longer persistence was found in combination therapy with TNFi but remission  
53  
54  
55  
56  
57  
58  
59

1  
2  
3 rates were not significantly different from monotherapy group[14]. The south Swedish SSATG  
4  
5 registry[33] evaluated differences in biologics monotherapy persistence in different biologics  
6  
7 courses over 6 years and highlighted a significant difference among bDMARDs with highest  
8  
9 retention rates observed for RTX and ETA. In RADIUS registry[34], which analyzed different efficacy  
10  
11 between ETA, INF and csDMARDs therapy, patients receiving either ETA plus MTX (adjusted OR  
12  
13 1.29, 95%CI 1.09-1.52,  $p<0,01$ ) or ETA monotherapy (OR 1.23, 95% CI 1.02-1.47,  $p<0,05$ ) were  
14  
15 more likely to achieve a modified ACR20-response at 12 months than patients receiving MTX  
16  
17 alone, INF plus MTX or INF alone; persistence in therapy however was higher for INF plus MTX  
18  
19 (71% of INF group persisted in therapy after 12 months; versus 69% of ETA monotherapy, 67% INF  
20  
21 alone and 61% ETA plus MTX); noteworthy cost of the therapy was claimed as a significant cause  
22  
23 of discontinuation of biologic therapy in this registry (up to 6% of ETA monotherapy changed  
24  
25 treatment due to high costs). The ACT-iON observational study[35] explored different persistence  
26  
27 rates among first-line TNFi and TCZ and showed a better persistence for TCZ compared to TNFi as a  
28  
29 whole; a comparison between first-line monotherapies was not possible due to the low number of  
30  
31 cases. Our data are in keeping with current literature and show a lower persistence for first-line  
32  
33 monoclonal TNFi (ADA and INF) monotherapy compared with ETA monotherapy, suggesting that  
34  
35 these bDMARDs should be avoided when a TNFi monotherapy is thought to be necessary.  
36  
37  
38  
39  
40

41  
42 Data from RTCs confirm this tendency among TNFi, either in terms of retention rate as well for  
43  
44 radiological outcomes, but long term head-to-head comparative trials among different bDMARDs  
45  
46 specifically designed to test this outcome are lacking. With regard to non-TNFi, data about a real  
47  
48 superiority of combination therapy compared to monotherapy are controversial[7,26]. A pan-  
49  
50 European analysis of registries including nearly 3400 pts showed that retention of ABA was not  
51  
52 influenced by csDMARDs co-therapy[7]. TCZ has gained the reputation to be the best bDMARD to  
53  
54 utilize in monotherapy and the only one with a satisfactory durability[12,13,36] and cost-  
55  
56  
57  
58  
59

1  
2  
3 effectiveness[37]. However, also for this drug, association strategy has demonstrated to be useful  
4  
5 in clinical trials giving some advantages when compared with monotherapy. In ACT-RAY trial, after  
6  
7 2 years, a difference in radiographic progression was observed favoring combination regimen with  
8  
9 MTX[38] and, in a recent post-hoc sub-analysis of ACT-SURE study, concomitant csDMARDs helped  
10  
11 to achieve low disease activity earlier than in TCZ monotherapy[39], similarly to what  
12  
13 demonstrated by Kaneko et al. in SURPRISE study[40]. Conversely, other studies did not show  
14  
15 particular advantages in terms of clinical efficacy of TCZ combination therapy over  
16  
17 monotherapy[41,42]. In ADACTA study[43] TCZ monotherapy reduced significantly disease activity  
18  
19 score (DAS) and Clinical Disease Activity Index (CDAI) compared to ADA monotherapy after 24  
20  
21 weeks, in a head-to-head comparison between monotherapies. Our study confirms a similar  
22  
23 persistence rate between non-TNFi monotherapy compared to combination, but the small size of  
24  
25 our sample and the calendar-period of the analysis does not allow a conclusive remark.  
26  
27  
28

29  
30  
31 Our data show that either MTX or LFN or combination of different csDMARDs significantly increase  
32  
33 bDMARDs persistence rate, while CYA is associated with a higher (but not significant) rate of drug  
34  
35 failure. Previous reports on the benefits of combining different csDMARDs with bDMARDs have  
36  
37 shown contrasting results; Soliman et al.[16] explored the role of different csDMARDs intervention  
38  
39 in biological persistence in a real-life study which evaluated persistence in over 10,000 pts from a  
40  
41 British registry and stated that MTX combination was linked to a better persistence of the first  
42  
43 TNFi when compared to no csDMARDs, LFN or SSZ but the best overall persistence was seen  
44  
45 among pts receiving TNFi in combination to MTX and either SSZ or HCQ or both, in line with our  
46  
47 results. Similarly, Manders et al. found a similar persistence rate in TNFi plus MTX group compared  
48  
49 to TNFi plus MTX plus others[44]. De Stefano et al.[45] reported a similar efficacy and safety  
50  
51 profile for TNFi combined with either MTX or LFN in Early RA, but univocal data for LFN  
52  
53 combination to bDMARDs are lacking and limited by the high number of associations with INF[46].  
54  
55  
56  
57  
58  
59

1  
2  
3 Conversely, Kristensen et al.[29] demonstrated that concomitant MTX, but not other csDMARDs,  
4  
5 was associated with a better persistence with first-line ETA or INF therapy, but significantly higher  
6  
7 for ETA. A positive influence in terms of efficacy has been observed for LFN combined with RTX in  
8  
9 GERINIS study[47] and in CERERRA collaboration[48].  
10

11  
12 When stratifying by calendar year - subclasses, after the introduction of other bDMARDs in current  
13  
14 recommended therapeutic approach, the risk of failure for INF monotherapy slightly increased,  
15  
16 while ADA monotherapy became not statistically different from ETA. Higher number of  
17  
18 comorbidities and longer disease duration in this subgroup could reflect the selection of a  
19  
20 particular subset of patients for whom an acceptance of a sub-optimal control of disease activity  
21  
22 has been made, despite a real efficacy of the drug. Afterwards, the reduction of the sample size  
23  
24 after this stratification could have influenced the results as well as the prescription attitude of  
25  
26 bDMARDs might have changed during the period of analysis. In fact, as shown by literature[2,25],  
27  
28 the year of treatment could have influenced bDMARD retention rate, since rheumatologists are  
29  
30 more prone to change biologics if more alternatives are available[27], although data about this  
31  
32 issue are controversial[49].  
33  
34  
35  
36  
37  
38

39 Our study has some limitations. The different burden of prescribed bDMARDs (being ETA, ADA and  
40  
41 INF the most prescribed ones) could have influenced our results; to this regard, GOL, CTZ and non-  
42  
43 TNFi associated with a lower prescription rate and RTX was excluded due to the local limitation in  
44  
45 first-line deliverability. We adjusted for pre-specified confounders but confounding of unmeasured  
46  
47 factors could not be excluded (50). Furthermore, the design of the study could not differentiate  
48  
49 between patients starting monotherapy “ab initio” and those reaching such monotherapy by a  
50  
51 “step-down” process; despite this behavior accounts for only a small proportion[25], the overall  
52  
53 prevalence could have been under-recognized due to specific design of trials and “real-life”  
54  
55 databases[16]; anyway, characterizing such a population was out of the scope of our study which  
56  
57  
58  
59

1  
2  
3 focuses only on the first group (“ab initio” monotherapies). Other limitations are intrinsic in the  
4  
5 AHD-based design of the study, in particular lack of control of data collected for non-clinical  
6  
7 purposes and misclassification biases; furthermore clinical outcomes are lacking (absence of  
8  
9 disease activity and radiological outcome data; specific causes of bDMARD failure or monotherapy  
10  
11 prescription, such as patients’ or physicians’ preferences[22]; possible alternative therapeutic  
12  
13 schemes, including spacing of the bDMARD scheduled administration; different dosages of  
14  
15 csDMARDs co-therapy)[50].  
16  
17

18  
19 However the RECORD study has some relevant strengths: its large sample size, allowing the  
20  
21 examination of the effect of concomitant bDMARDs and csDMARDs, and the completeness of data  
22  
23 without loss at follow-up. This is, to our knowledge, the first AHD-based study investigating  
24  
25 different persistence rates in first-line biological monotherapies combining all bDMARDs approved  
26  
27 as “first-line” treatment.  
28  
29

30  
31 In conclusion, our study supports the currently recommended use of bDMARDs in combination  
32  
33 with csDMARDs, underlining a higher risk of drug withdrawal for TNFi monotherapy compared  
34  
35 with combination and suggesting that, among bDMARDs, ETA should be preferred over INF - and  
36  
37 to lesser extent ADA - when a first-line monotherapy is necessary. Our results strengthen the  
38  
39 positive influence of MTX, LFN or combination of csDMARDs in improving bDMARDs persistence.  
40  
41  
42  
43  
44  
45  
46  
47  
48  
49  
50  
51  
52  
53  
54  
55  
56  
57  
58  
59  
60

1  
2  
3 **Figure Legends**  
4

5  
6 **Figure 1**  
7

8  
9 Crude and adjusted HR and 95%CI for bDMARD failure when administered in first-line  
10  
11 monotherapy and in combination with csDMARDs.  
12  
13

14  
15  
16  
17 **Figure 2**  
18

19  
20 Crude and adjusted HR and 95%CI for different csDMARDs in determining the risk of fist-line  
21  
22 bDMARD failure.  
23  
24  
25  
26  
27  
28  
29  
30  
31  
32  
33  
34  
35  
36  
37  
38  
39  
40  
41  
42  
43  
44  
45  
46  
47  
48  
49  
50  
51  
52  
53  
54  
55  
56  
57  
58  
59  
60



**Competing interests:**

E. Silvagni; G. Carrara; A. Zanetti; C.A. Scirè: none to declare. A. Bortoluzzi: Sanofi, Alfa-Wasserman. M. Govoni: Pfizer, Abbvie, MSD, Roche, BMS, Sanofi, Lilly, Novartis, Celgene: fees for sponsored lectures and/or participation in advisory boards.

**Data sharing information:**

No additional information are available.

**Funding:**

Study supported by the Italian Society for Rheumatology (SIR) as part of the Epidemiology Unit development program.

**Authorship Criteria:**

Substantial contributions to study conception and design: ES, AB, GC, AZ, MG, CAS

Substantial contributions to acquisition of data: GC, ES, AZ, CAS

Substantial contributions to analysis and interpretation of data: ES, AB, GC, CAS

Drafting the article or revising it critically for important intellectual content: ES, AB, GC, AZ, MG, CAS

Final approval of the version of the article to be published: ES, AB, GC, AZ, MG, CAS

1  
2  
3 Agreement to be accountable for all aspects of the work in ensuring that questions related to the  
4  
5 accuracy or integrity of any part of the work are appropriately investigated and resolved: ES, AB,  
6  
7 GC, AZ, MG, CAS  
8  
9

10 No other potential author who fulfils the ICMJE Recommendations criteria has been excluded as  
11  
12 an author.  
13  
14  
15  
16  
17  
18  
19  
20  
21  
22  
23  
24  
25  
26  
27  
28  
29  
30  
31  
32  
33  
34  
35  
36  
37  
38  
39  
40  
41  
42  
43  
44  
45  
46  
47  
48  
49  
50  
51  
52  
53  
54  
55  
56  
57  
58  
59  
60

## References

- 1 Smolen JS, Landewé R, Bijlsma J, *et al*. EULAR recommendations for the management of rheumatoid arthritis with synthetic and biological disease-modifying antirheumatic drugs: 2016 update. *Ann Rheum Dis* 2017;**76**:960–77. doi:10.1136/annrheumdis-2016-210715
- 2 Souto A, Maneiro JR, Gómez-Reino JJ. Rate of discontinuation and drug survival of biologic therapies in rheumatoid arthritis: a systematic review and meta-analysis of drug registries and health care databases. *Rheumatol Oxf Engl* 2016;**55**:523–34. doi:10.1093/rheumatology/kev374
- 3 O'Mahony A, Berg EL, John MR, *et al*. THU0526 Tocilizumab is Less Dependent than Adalimumab on Supplementary Effects of Methotrexate for Immunoregulation: A Biomap® Profiling Study. *Ann Rheum Dis* 2014;**73**:365–365. doi:10.1136/annrheumdis-2014-eular.3386
- 4 Burmester G-R, Kivitz AJ, Kupper H, *et al*. Efficacy and safety of ascending methotrexate dose in combination with adalimumab: the randomised CONCERTO trial. *Ann Rheum Dis* 2015;**74**:1037–44. doi:10.1136/annrheumdis-2013-204769
- 5 Jani M, Barton A, Warren RB, *et al*. The role of DMARDs in reducing the immunogenicity of TNF inhibitors in chronic inflammatory diseases. *Rheumatol Oxf Engl* 2014;**53**:213–22. doi:10.1093/rheumatology/ket260
- 6 Garcês S, Demengeot J, Benito-Garcia E. The immunogenicity of anti-TNF therapy in immune-mediated inflammatory diseases: a systematic review of the literature with a meta-analysis. *Ann Rheum Dis* 2013;**72**:1947–55. doi:10.1136/annrheumdis-2012-202220
- 7 Choy E, Aletaha D, Behrens F, *et al*. Monotherapy with biologic disease-modifying anti-rheumatic drugs in rheumatoid arthritis. *Rheumatology* 2016;:kew271. doi:10.1093/rheumatology/kew271
- 8 Burmester GR, Choy E, Kivitz A, *et al*. Low immunogenicity of tocilizumab in patients with rheumatoid arthritis. *Ann Rheum Dis* 2017;**76**:1078–85. doi:10.1136/annrheumdis-2016-210297
- 9 Dougados M, Kissel K, Conaghan PG, *et al*. Clinical, radiographic and immunogenic effects after 1 year of tocilizumab-based treatment strategies in rheumatoid arthritis: the ACT-RAY study. *Ann Rheum Dis* 2014;**73**:803–9. doi:10.1136/annrheumdis-2013-204761
- 10 Nash P, Nayiager S, Genovese MC, *et al*. Immunogenicity, safety, and efficacy of abatacept administered subcutaneously with or without background methotrexate in patients with rheumatoid arthritis: results from a phase III, international, multicenter, parallel-arm, open-label study. *Arthritis Care Res* 2013;**65**:718–28. doi:10.1002/acr.21876
- 11 van der Heijde D, Breedveld FC, Kavanaugh A, *et al*. Disease activity, physical function, and radiographic progression after longterm therapy with adalimumab plus methotrexate: 5-year results of PREMIER. *J Rheumatol* 2010;**37**:2237–46. doi:10.3899/jrheum.100208
- 12 Mehta N, Schneider LK, McCardell E. Rheumatoid Arthritis: Selecting Monotherapy Versus Combination Therapy. *J Clin Rheumatol Pract Rep Rheum Musculoskelet Dis* Published Online First: 18 January 2017. doi:10.1097/RHU.0000000000000410
- 13 Emery P, Sebba A, Huizinga TWJ. Biologic and oral disease-modifying antirheumatic drug monotherapy in rheumatoid arthritis. *Ann Rheum Dis* 2013;**72**:1897–904. doi:10.1136/annrheumdis-2013-203485

- 1  
2  
3 14 Listing J, Strangfeld A, Rau R, *et al.* Clinical and functional remission: even though biologics are superior  
4 to conventional DMARDs overall success rates remain low--results from RABBIT, the German biologics  
5 register. *Arthritis Res Ther* 2006;**8**:R66. doi:10.1186/ar1933  
6  
7 15 Lee SJ, Chang H, Yazici Y, *et al.* Utilization trends of tumor necrosis factor inhibitors among patients  
8 with rheumatoid arthritis in a United States observational cohort study. *J Rheumatol* 2009;**36**:1611–7.  
9 doi:10.3899/jrheum.080889  
10  
11 16 Soliman MM, Ashcroft DM, Watson KD, *et al.* Impact of concomitant use of DMARDs on the persistence  
12 with anti-TNF therapies in patients with rheumatoid arthritis: results from the British Society for  
13 Rheumatology Biologics Register. *Ann Rheum Dis* 2011;**70**:583–9. doi:10.1136/ard.2010.139774  
14  
15 17 Carrara G, Scirè CA, Zambon A, *et al.* A validation study of a new classification algorithm to identify  
16 rheumatoid arthritis using administrative health databases: case-control and cohort diagnostic  
17 accuracy studies. Results from the RECOrd linkage On Rheumatic Diseases study of the Italian Society  
18 for Rheumatology. *BMJ Open* 2015;**5**:e006029. doi:10.1136/bmjopen-2014-006029  
19  
20 18 Generali E, Carrara G, Selmi C, *et al.* Comparison of the risks of hospitalisation for cardiovascular events  
21 in patients with rheumatoid arthritis treated with tocilizumab and etanercept. *ClinExpRheumatol*  
22 2017;;in Press.  
23  
24 19 Caprioli M, Carrara G, Sakellariou G, *et al.* Influence of aromatase inhibitors therapy on the occurrence  
25 of rheumatoid arthritis in women with breast cancer: results from a large population-based study of  
26 the Italian Society for Rheumatology. *RMD Open* 2017;**3**. doi:10.1136/rmdopen-2017-000523  
27  
28 20 Barber C, Lacaille D, Fortin PR. Systematic review of validation studies of the use of administrative data  
29 to identify serious infections. *Arthritis Care Res* 2013;**65**:1343–57. doi:10.1002/acr.21959  
30  
31 21 Deyo RA, Cherkin DC, Ciol MA. Adapting a clinical comorbidity index for use with ICD-9-CM  
32 administrative databases. *J Clin Epidemiol* 1992;**45**:613–9. doi:10.1016/0895-4356(92)90133-8  
33  
34 22 Pappas DA, Reed GW, Saunders K, *et al.* Characteristics Associated with Biologic Monotherapy Use in  
35 Biologic-Naive Patients with Rheumatoid Arthritis in a US Registry Population. *Rheumatol Ther*  
36 2015;**2**:85–96. doi:10.1007/s40744-015-0008-9  
37  
38 23 Jørgensen TS, Kristensen LE, Christensen R, *et al.* Effectiveness and drug adherence of biologic  
39 monotherapy in routine care of patients with rheumatoid arthritis: a cohort study of patients  
40 registered in the Danish biologics registry. *Rheumatol Oxf Engl* 2015;**54**:2156–65.  
41 doi:10.1093/rheumatology/kev216  
42  
43 24 Heiberg MS, Koldingsnes W, Mikkelsen K, *et al.* The comparative one-year performance of anti-tumor  
44 necrosis factor  $\alpha$  drugs in patients with rheumatoid arthritis, psoriatic arthritis, and ankylosing  
45 spondylitis: Results from a longitudinal, observational, multicenter study. *Arthritis Care Res*  
46 2008;**59**:234–40. doi:10.1002/art.23333  
47  
48 25 Gabay C, Riek M, Scherer A, *et al.* Effectiveness of biologic DMARDs in monotherapy versus in  
49 combination with synthetic DMARDs in rheumatoid arthritis: data from the Swiss Clinical Quality  
50 Management Registry. *Rheumatol Oxf Engl* 2015;**54**:1664–72. doi:10.1093/rheumatology/kev019  
51  
52 26 Zhang J, Xie F, Delzell E, *et al.* Impact of Biologic Agents With and Without Concomitant Methotrexate  
53 and at Reduced Doses in Older Rheumatoid Arthritis Patients. *Arthritis Care Res* 2015;**67**:624–32.  
54 doi:10.1002/acr.22510  
55  
56  
57  
58  
59

- 1  
2  
3 27 Scirè CA, Caporali R, Sarzi-Puttini P, *et al.* Drug survival of the first course of anti-TNF agents in patients  
4 with rheumatoid arthritis and seronegative spondyloarthritis: analysis from the MonitorNet database.  
5 *Clin Exp Rheumatol* 2013;**31**:857–63.
- 6  
7 28 Orme ME, Macgilchrist KS, Mitchell S, *et al.* Systematic review and network meta-analysis of  
8 combination and monotherapy treatments in disease-modifying antirheumatic drug-experienced  
9 patients with rheumatoid arthritis: analysis of American College of Rheumatology criteria scores 20, 50,  
10 and 70. *Biol Targets Ther* 2012;**6**:429–64. doi:10.2147/BTT.S36707
- 11  
12 29 Kristensen LE, Saxne T, Nilsson J-A, *et al.* Impact of concomitant DMARD therapy on adherence to  
13 treatment with etanercept and infliximab in rheumatoid arthritis. Results from a six-year observational  
14 study in southern Sweden. *Arthritis Res Ther* 2006;**8**:R174. doi:10.1186/ar2084
- 15  
16 30 Favalli EG, Pregolato F, Biggioggero M, *et al.* Twelve-Year Retention Rate of First-Line Tumor Necrosis  
17 Factor Inhibitors in Rheumatoid Arthritis: Real-Life Data From a Local Registry. *Arthritis Care Res*  
18 2016;**68**:432–9. doi:10.1002/acr.22788
- 19  
20 31 Frazier-Mironer A, Dougados M, Mariette X, *et al.* Retention rates of adalimumab, etanercept and  
21 infliximab as first and second-line biotherapy in patients with rheumatoid arthritis in daily practice. *Jt*  
22 *Bone Spine Rev Rhum* 2014;**81**:352–9. doi:10.1016/j.jbspin.2014.02.014
- 23  
24 32 Iannone F, Gremese E, Atzeni F, *et al.* Longterm retention of tumor necrosis factor- $\alpha$  inhibitor therapy  
25 in a large italian cohort of patients with rheumatoid arthritis from the GISEA registry: an appraisal of  
26 predictors. *J Rheumatol* 2012;**39**:1179–84. doi:10.3899/jrheum.111125
- 27  
28 33 Jørgensen TS, Turesson C, Kapetanovic M, *et al.* EQ-5D utility, response and drug survival in rheumatoid  
29 arthritis patients on biologic monotherapy: A prospective observational study of patients registered in  
30 the south Swedish SSATG registry. *PLoS One* 2017;**12**:e0169946. doi:10.1371/journal.pone.0169946
- 31  
32 34 Weaver AL, Lautzenheiser RL, Schiff MH, *et al.* Real-world effectiveness of select biologic and DMARD  
33 monotherapy and combination therapy in the treatment of rheumatoid arthritis: results from the  
34 RADIUS observational registry. *Curr Med Res Opin* 2006;**22**:185–98. doi:10.1185/030079905X65510
- 35  
36 35 Choy EH, Bernasconi C, Aassi M, *et al.* Treatment of Rheumatoid Arthritis With Anti-Tumor Necrosis  
37 Factor or Tocilizumab Therapy as First Biologic Agent in a Global Comparative Observational Study.  
38 *Arthritis Care Res* 2017;**69**:1484–94. doi:10.1002/acr.23303
- 39  
40 36 Buckley F, Finckh A, Huizinga TWJ, *et al.* Comparative Efficacy of Novel DMARDs as Monotherapy and in  
41 Combination with Methotrexate in Rheumatoid Arthritis Patients with Inadequate Response to  
42 Conventional DMARDs: A Network Meta-Analysis. *J Manag Care Spec Pharm* 2015;**21**:409–23.  
43 doi:10.18553/jmcp.2015.21.5.409
- 44  
45 37 Batticciotto A, Ravasio R, Riva M, *et al.* Efficacy and Treatment Costs of Monotherapy with bDMARDs in  
46 the Treatment of Rheumatoid Arthritis in Patients Intolerant to or Inappropriate to Continue Treatment  
47 with Methotrexate. *Adv Ther* 2016;**33**:1360–73. doi:10.1007/s12325-016-0372-z
- 48  
49 38 Huizinga TWJ, Conaghan PG, Martin-Mola E, *et al.* Clinical and radiographic outcomes at 2 years and  
50 the effect of tocilizumab discontinuation following sustained remission in the second and third year of  
51 the ACT-RAY study. *Ann Rheum Dis* 2015;**74**:35–43. doi:10.1136/annrheumdis-2014-205752
- 52  
53 39 Mueller RB, Graninger W, Sidiropoulos P, *et al.* Median time to low disease activity is shorter in  
54 tocilizumab combination therapy with csDMARDs as compared to tocilizumab monotherapy in patients  
55 with active rheumatoid arthritis and inadequate responses to csDMARDs and/or TNF inhibitors: sub-  
56 analysis of the Swiss and Austrian patients from the ACT-SURE study. *Clin Rheumatol* 2017;**;**1–6.  
57 doi:10.1007/s10067-017-3779-2
- 58  
59

- 1  
2  
3 40 Kaneko Y, Atsumi T, Tanaka Y, *et al.* Comparison of adding tocilizumab to methotrexate with switching  
4 to tocilizumab in patients with rheumatoid arthritis with inadequate response to methotrexate: 52-  
5 week results from a prospective, randomised, controlled study (SURPRISE study). *Ann Rheum Dis*  
6 2016;**75**:1917–23. doi:10.1136/annrheumdis-2015-208426  
7  
8 41 Weinblatt ME, Kremer J, Cush J, *et al.* Tocilizumab as monotherapy or in combination with nonbiologic  
9 disease-modifying antirheumatic drugs: twenty-four-week results of an open-label, clinical practice  
10 study. *Arthritis Care Res* 2013;**65**:362–71. doi:10.1002/acr.21847  
11  
12 42 Alfonso-Cristancho R, Armstrong N, Arjunji R, *et al.* Comparative effectiveness of biologics for the  
13 management of rheumatoid arthritis: systematic review and network meta-analysis. *Clin Rheumatol*  
14 2017;**36**:25–34. doi:10.1007/s10067-016-3435-2  
15  
16 43 Gabay C, Emery P, van Vollenhoven R, *et al.* Tocilizumab monotherapy versus adalimumab  
17 monotherapy for treatment of rheumatoid arthritis (ADACTA): a randomised, double-blind, controlled  
18 phase 4 trial. *Lancet Lond Engl* 2013;**381**:1541–50. doi:10.1016/S0140-6736(13)60250-0  
19  
20 44 Manders SHM, Kievit W, Jansen TLTA, *et al.* Effectiveness of Tumor Necrosis Factor Inhibitors in  
21 Combination with Various csDMARD in the Treatment of Rheumatoid Arthritis: Data from the DREAM  
22 Registry. *J Rheumatol* 2016;**43**:1787–94. doi:10.3899/jrheum.151014  
23  
24 45 De Stefano R, Frati E, Nargi F, *et al.* Comparison of combination therapies in the treatment of  
25 rheumatoid arthritis: leflunomide-anti-TNF-alpha versus methotrexate-anti-TNF-alpha. *Clin Rheumatol*  
26 2010;**29**:517–24. doi:10.1007/s10067-009-1349-y  
27  
28 46 Flendrie M, Creemers MCW, Welsing PMJ, *et al.* The influence of previous and concomitant  
29 leflunomide on the efficacy and safety of infliximab therapy in patients with rheumatoid arthritis; a  
30 longitudinal observational study. *Rheumatology* 2005;**44**:472–8. doi:10.1093/rheumatology/keh508  
31  
32 47 Wendler J, Burmester GR, Sørensen H, *et al.* Rituximab in patients with rheumatoid arthritis in routine  
33 practice (GERINIS): six-year results from a prospective, multicentre, non-interventional study in 2,484  
34 patients. *Arthritis Res Ther* 2014;**16**:R80. doi:10.1186/ar4521  
35  
36 48 Chatzidionysiou K, Lie E, Nasonov E, *et al.* Effectiveness of disease-modifying antirheumatic drug co-  
37 therapy with methotrexate and leflunomide in rituximab-treated rheumatoid arthritis patients: results  
38 of a 1-year follow-up study from the CERERRA collaboration. *Ann Rheum Dis* 2012;**71**:374–7.  
39 doi:10.1136/annrheumdis-2011-200003  
40  
41 49 Acurcio FA, Machado MAA, Moura CS, *et al.* Medication Persistence of Disease-Modifying  
42 Antirheumatic Drugs and Anti-Tumor Necrosis Factor Agents in a Cohort of Patients With Rheumatoid  
43 Arthritis in Brazil. *Arthritis Care Res* 2016;**68**:1489–96. doi:10.1002/acr.22840  
44  
45 50 Krishnan E, Fries JF. Measuring effectiveness of drugs in observational databanks: promises and perils.  
46 *Arthritis Res Ther* 2004;**6**:41–4. doi:10.1186/ar1151  
47  
48  
49  
50  
51  
52  
53  
54  
55  
56  
57  
58  
59  
60

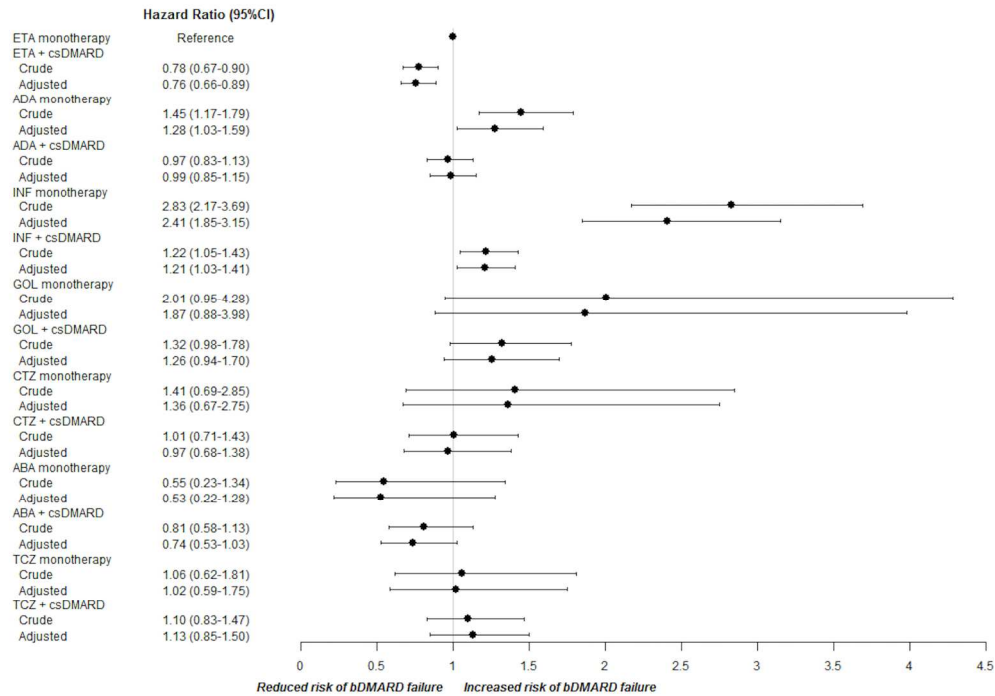

Figure 1  
Crude and adjusted HR and 95%CI for bDMARD failure when administered in first-line monotherapy and in combination with csDMARDs.

163x114mm (300 x 300 DPI)

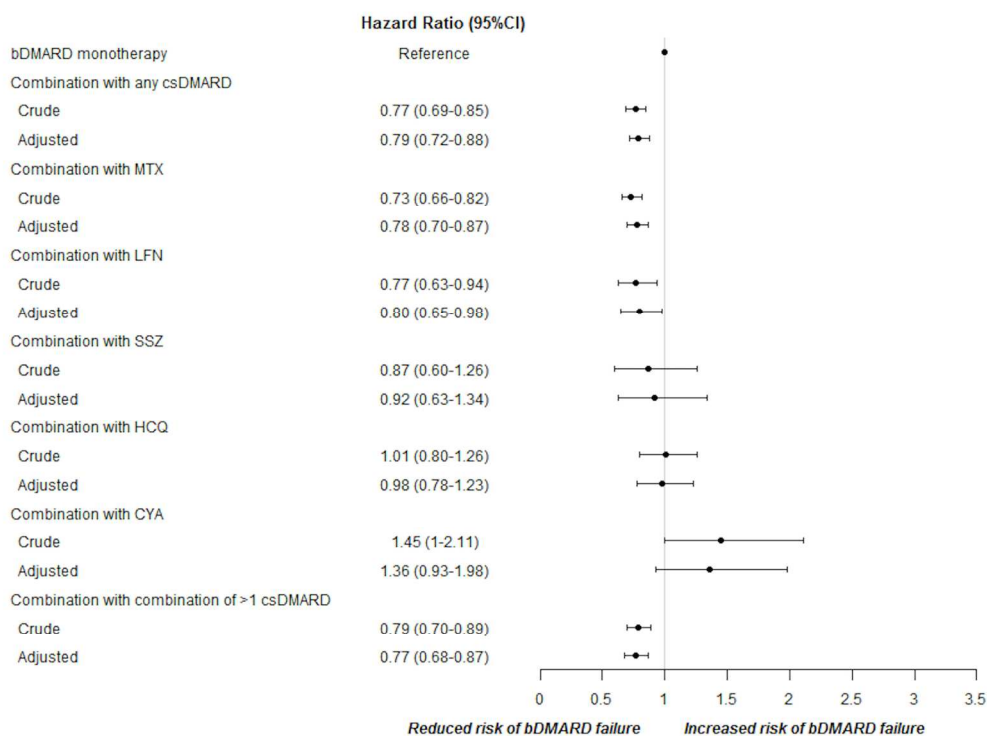

Figure 2  
Crude and adjusted HR and 95%CI for different csDMARDs in determining the risk of fist-line bDMARD failure.

152x114mm (300 x 300 DPI)



Supplementary file 1. Risk of drug failure of different bDMARDs monotherapy before and after  
31<sup>st</sup> december 2009.

| bDMARD monotherapy             | <i>Adjusted HR</i><br><i>(95%CI) before 31<sup>st</sup></i><br><i>december 2009</i> | <i>p</i> | <i>Adjusted HR</i><br><i>(95%CI) after 1<sup>st</sup></i><br><i>January</i><br><i>2010</i> | <i>p</i> |
|--------------------------------|-------------------------------------------------------------------------------------|----------|--------------------------------------------------------------------------------------------|----------|
| ETA monotherapy (385 patients) | 1 (ref)                                                                             |          | 1 (ref)                                                                                    |          |
| ADA monotherapy (201 patients) | 1.40 (1.09 – 1.78)                                                                  | 0.008    | 1.17 (0.70-1.96)                                                                           | 0.554    |
| INF monotherapy (81 patients)  | 2.20 (1.59 – 3.05)                                                                  | <0.001   | 2.72 (1.51 – 4.90)                                                                         | 0.001    |
| GOL monotherapy (21 patients)  | <i>Not applicable*</i>                                                              |          | 1.38 (0.60 – 3.18)                                                                         | 0.447    |
| CTZ monotherapy (30 patients)  | <i>Not applicable*</i>                                                              |          | 1.08 (0.51 – 2.29)                                                                         | 0.843    |
| ABA monotherapy (34 patients)  | <i>Not applicable*</i>                                                              |          | 0.46 (0.18 – 1.15)                                                                         | 0.097    |
| TCZ monotherapy (47 patients)  | <i>Not applicable*</i>                                                              |          | 0.82 (0.45 – 1.48)                                                                         | 0.504    |

\* *Not applicable: based on the changes occurred in local approved first-line bDMARD deliverability.*

**The RECORD statement – checklist of items, extended from the STROBE statement, that should be reported in observational studies using routinely collected health data.**

|                           | Item No. | STROBE items                                                                                                                                                                               | Location in manuscript where items are reported | RECORD items                                                                                                                                                                                                                                                                                                                                                                                                                                | Location in manuscript where items are reported |
|---------------------------|----------|--------------------------------------------------------------------------------------------------------------------------------------------------------------------------------------------|-------------------------------------------------|---------------------------------------------------------------------------------------------------------------------------------------------------------------------------------------------------------------------------------------------------------------------------------------------------------------------------------------------------------------------------------------------------------------------------------------------|-------------------------------------------------|
| <b>Title and abstract</b> |          |                                                                                                                                                                                            |                                                 |                                                                                                                                                                                                                                                                                                                                                                                                                                             |                                                 |
|                           | 1        | (a) Indicate the study's design with a commonly used term in the title or the abstract (b) Provide in the abstract an informative and balanced summary of what was done and what was found |                                                 | RECORD 1.1: The type of data used should be specified in the title or abstract. When possible, the name of the databases used should be included.<br><br>RECORD 1.2: If applicable, the geographic region and timeframe within which the study took place should be reported in the title or abstract.<br><br>RECORD 1.3: If linkage between databases was conducted for the study, this should be clearly stated in the title or abstract. | Abstract                                        |
| <b>Introduction</b>       |          |                                                                                                                                                                                            |                                                 |                                                                                                                                                                                                                                                                                                                                                                                                                                             |                                                 |
| Background rationale      | 2        | Explain the scientific background and rationale for the investigation being reported                                                                                                       |                                                 |                                                                                                                                                                                                                                                                                                                                                                                                                                             | Introduction                                    |
| Objectives                | 3        | State specific objectives, including any prespecified hypotheses                                                                                                                           |                                                 |                                                                                                                                                                                                                                                                                                                                                                                                                                             | Introduction                                    |
| <b>Methods</b>            |          |                                                                                                                                                                                            |                                                 |                                                                                                                                                                                                                                                                                                                                                                                                                                             |                                                 |
| Study Design              | 4        | Present key elements of study design early in the paper                                                                                                                                    |                                                 |                                                                                                                                                                                                                                                                                                                                                                                                                                             | Methods                                         |
| Setting                   | 5        | Describe the setting, locations, and relevant dates, including periods of recruitment, exposure, follow-up, and data collection                                                            |                                                 |                                                                                                                                                                                                                                                                                                                                                                                                                                             | Methods                                         |
| Participants              | 6        | (a) <i>Cohort study</i> - Give the                                                                                                                                                         |                                                 | RECORD 6.1: The methods of study                                                                                                                                                                                                                                                                                                                                                                                                            | Methods                                         |

|                                                                                                                                                 |                              |                                                                                                                                                                                                                                                                                                                                                                                                                                                                                                                                                                                                                                                                                           |                                                                                                                                                                                      |                                                                                                                                                                                                                                                                                                                                                                                                                                                                                                                                                                                                                                                                     |            |
|-------------------------------------------------------------------------------------------------------------------------------------------------|------------------------------|-------------------------------------------------------------------------------------------------------------------------------------------------------------------------------------------------------------------------------------------------------------------------------------------------------------------------------------------------------------------------------------------------------------------------------------------------------------------------------------------------------------------------------------------------------------------------------------------------------------------------------------------------------------------------------------------|--------------------------------------------------------------------------------------------------------------------------------------------------------------------------------------|---------------------------------------------------------------------------------------------------------------------------------------------------------------------------------------------------------------------------------------------------------------------------------------------------------------------------------------------------------------------------------------------------------------------------------------------------------------------------------------------------------------------------------------------------------------------------------------------------------------------------------------------------------------------|------------|
| 1<br>2<br>3<br>4<br>5<br>6<br>7<br>8<br>9<br>10<br>11<br>12<br>13<br>14<br>15<br>16<br>17<br>18<br>19<br>20<br>21<br>22<br>23<br>24<br>25<br>26 |                              | <p>eligibility criteria, and the sources and methods of selection of participants. Describe methods of follow-up</p> <p><i>Case-control study</i> - Give the eligibility criteria, and the sources and methods of case ascertainment and control selection. Give the rationale for the choice of cases and controls</p> <p><i>Cross-sectional study</i> - Give the eligibility criteria, and the sources and methods of selection of participants</p> <p><i>(b) Cohort study</i> - For matched studies, give matching criteria and number of exposed and unexposed</p> <p><i>Case-control study</i> - For matched studies, give matching criteria and the number of controls per case</p> |                                                                                                                                                                                      | <p>population selection (such as codes or algorithms used to identify subjects) should be listed in detail. If this is not possible, an explanation should be provided.</p> <p>RECORD 6.2: Any validation studies of the codes or algorithms used to select the population should be referenced. If validation was conducted for this study and not published elsewhere, detailed methods and results should be provided.</p> <p>RECORD 6.3: If the study involved linkage of databases, consider use of a flow diagram or other graphical display to demonstrate the data linkage process, including the number of individuals with linked data at each stage.</p> |            |
| 27<br>28<br>29<br>30<br>31<br>32<br>33                                                                                                          | Variables                    | 7                                                                                                                                                                                                                                                                                                                                                                                                                                                                                                                                                                                                                                                                                         | Clearly define all outcomes, exposures, predictors, potential confounders, and effect modifiers. Give diagnostic criteria, if applicable.                                            | RECORD 7.1: A complete list of codes and algorithms used to classify exposures, outcomes, confounders, and effect modifiers should be provided. If these cannot be reported, an explanation should be provided.                                                                                                                                                                                                                                                                                                                                                                                                                                                     | Methods    |
| 34<br>35<br>36<br>37<br>38<br>39<br>40<br>41                                                                                                    | Data sources/<br>measurement | 8                                                                                                                                                                                                                                                                                                                                                                                                                                                                                                                                                                                                                                                                                         | For each variable of interest, give sources of data and details of methods of assessment (measurement). Describe comparability of assessment methods if there is more than one group |                                                                                                                                                                                                                                                                                                                                                                                                                                                                                                                                                                                                                                                                     | Methods    |
| 42<br>43<br>44                                                                                                                                  | Bias                         | 9                                                                                                                                                                                                                                                                                                                                                                                                                                                                                                                                                                                                                                                                                         | Describe any efforts to address potential sources of bias                                                                                                                            |                                                                                                                                                                                                                                                                                                                                                                                                                                                                                                                                                                                                                                                                     | Discussion |

|                                                                                                                                                  |                                  |    |                                                                                                                                                                                                                                                                                                                                                                                                                                                                                                                                                                      |                                                                                                                                                                                                                                                              |         |
|--------------------------------------------------------------------------------------------------------------------------------------------------|----------------------------------|----|----------------------------------------------------------------------------------------------------------------------------------------------------------------------------------------------------------------------------------------------------------------------------------------------------------------------------------------------------------------------------------------------------------------------------------------------------------------------------------------------------------------------------------------------------------------------|--------------------------------------------------------------------------------------------------------------------------------------------------------------------------------------------------------------------------------------------------------------|---------|
| 1<br>2<br>3<br>4<br>5<br>6<br>7                                                                                                                  | Study size                       | 10 | Explain how the study size was arrived at                                                                                                                                                                                                                                                                                                                                                                                                                                                                                                                            |                                                                                                                                                                                                                                                              | N/A     |
| 8<br>9<br>10<br>11<br>12<br>13<br>14<br>15<br>16<br>17<br>18<br>19<br>20<br>21<br>22<br>23<br>24<br>25<br>26<br>27<br>28<br>29<br>30<br>31<br>32 | Quantitative variables           | 11 | Explain how quantitative variables were handled in the analyses. If applicable, describe which groupings were chosen, and why                                                                                                                                                                                                                                                                                                                                                                                                                                        |                                                                                                                                                                                                                                                              | Methods |
| 33<br>34<br>35<br>36<br>37<br>38<br>39<br>40<br>41<br>42                                                                                         | Statistical methods              | 12 | (a) Describe all statistical methods, including those used to control for confounding<br>(b) Describe any methods used to examine subgroups and interactions<br>(c) Explain how missing data were addressed<br>(d) <i>Cohort study</i> - If applicable, explain how loss to follow-up was addressed<br><i>Case-control study</i> - If applicable, explain how matching of cases and controls was addressed<br><i>Cross-sectional study</i> - If applicable, describe analytical methods taking account of sampling strategy<br>(e) Describe any sensitivity analyses |                                                                                                                                                                                                                                                              | Methods |
| 43<br>44<br>45<br>46<br>47                                                                                                                       | Data access and cleaning methods |    | ..                                                                                                                                                                                                                                                                                                                                                                                                                                                                                                                                                                   | RECORD 12.1: Authors should describe the extent to which the investigators had access to the database population used to create the study population.<br><br>RECORD 12.2: Authors should provide information on the data cleaning methods used in the study. | Methods |
|                                                                                                                                                  | Linkage                          |    | ..                                                                                                                                                                                                                                                                                                                                                                                                                                                                                                                                                                   | RECORD 12.3: State whether the                                                                                                                                                                                                                               | Methods |

|                  |    |                                                                                                                                                                                                                                                                                                                                                 |  |                                                                                                                                                                                                                                                                                                                    |         |
|------------------|----|-------------------------------------------------------------------------------------------------------------------------------------------------------------------------------------------------------------------------------------------------------------------------------------------------------------------------------------------------|--|--------------------------------------------------------------------------------------------------------------------------------------------------------------------------------------------------------------------------------------------------------------------------------------------------------------------|---------|
|                  |    |                                                                                                                                                                                                                                                                                                                                                 |  | study included person-level, institutional-level, or other data linkage across two or more databases. The methods of linkage and methods of linkage quality evaluation should be provided.                                                                                                                         |         |
| <b>Results</b>   |    |                                                                                                                                                                                                                                                                                                                                                 |  |                                                                                                                                                                                                                                                                                                                    |         |
| Participants     | 13 | (a) Report the numbers of individuals at each stage of the study ( <i>e.g.</i> , numbers potentially eligible, examined for eligibility, confirmed eligible, included in the study, completing follow-up, and analysed)<br>(b) Give reasons for non-participation at each stage.<br>(c) Consider use of a flow diagram                          |  | RECORD 13.1: Describe in detail the selection of the persons included in the study ( <i>i.e.</i> , study population selection) including filtering based on data quality, data availability and linkage. The selection of included persons can be described in the text and/or by means of the study flow diagram. | Results |
| Descriptive data | 14 | (a) Give characteristics of study participants ( <i>e.g.</i> , demographic, clinical, social) and information on exposures and potential confounders<br>(b) Indicate the number of participants with missing data for each variable of interest<br>(c) <i>Cohort study</i> - summarise follow-up time ( <i>e.g.</i> , average and total amount) |  |                                                                                                                                                                                                                                                                                                                    | Results |
| Outcome data     | 15 | <i>Cohort study</i> - Report numbers of outcome events or summary measures over time<br><i>Case-control study</i> - Report numbers in each exposure category, or summary measures of exposure<br><i>Cross-sectional study</i> - Report numbers of outcome events or                                                                             |  |                                                                                                                                                                                                                                                                                                                    | Results |

|                                                                                     |                   |                  |                                                                                                                                                                                                                                                                                                                                                                                                                 |                                                                                                                                                                                                                                                                                                          |            |
|-------------------------------------------------------------------------------------|-------------------|------------------|-----------------------------------------------------------------------------------------------------------------------------------------------------------------------------------------------------------------------------------------------------------------------------------------------------------------------------------------------------------------------------------------------------------------|----------------------------------------------------------------------------------------------------------------------------------------------------------------------------------------------------------------------------------------------------------------------------------------------------------|------------|
|                                                                                     |                   | summary measures |                                                                                                                                                                                                                                                                                                                                                                                                                 |                                                                                                                                                                                                                                                                                                          |            |
| 1<br>2<br>3<br>4<br>5<br>6<br>7<br>8<br>9<br>10<br>11<br>12<br>13<br>14<br>15<br>16 | Main results      | 16               | (a) Give unadjusted estimates and, if applicable, confounder-adjusted estimates and their precision (e.g., 95% confidence interval). Make clear which confounders were adjusted for and why they were included<br>(b) Report category boundaries when continuous variables were categorized<br>(c) If relevant, consider translating estimates of relative risk into absolute risk for a meaningful time period |                                                                                                                                                                                                                                                                                                          | Results    |
| 17<br>18<br>19<br>20<br>21                                                          | Other analyses    | 17               | Report other analyses done—e.g., analyses of subgroups and interactions, and sensitivity analyses                                                                                                                                                                                                                                                                                                               |                                                                                                                                                                                                                                                                                                          | Results    |
| 22                                                                                  | <b>Discussion</b> |                  |                                                                                                                                                                                                                                                                                                                                                                                                                 |                                                                                                                                                                                                                                                                                                          |            |
| 23<br>24<br>25                                                                      | Key results       | 18               | Summarise key results with reference to study objectives                                                                                                                                                                                                                                                                                                                                                        |                                                                                                                                                                                                                                                                                                          | Discussion |
| 26<br>27<br>28<br>29<br>30<br>31<br>32<br>33<br>34<br>35                            | Limitations       | 19               | Discuss limitations of the study, taking into account sources of potential bias or imprecision. Discuss both direction and magnitude of any potential bias                                                                                                                                                                                                                                                      | RECORD 19.1: Discuss the implications of using data that were not created or collected to answer the specific research question(s). Include discussion of misclassification bias, unmeasured confounding, missing data, and changing eligibility over time, as they pertain to the study being reported. | Discussion |
| 36<br>37<br>38<br>39<br>40<br>41<br>42<br>43<br>44                                  | Interpretation    | 20               | Give a cautious overall interpretation of results considering objectives, limitations, multiplicity of analyses, results from similar studies, and other relevant evidence                                                                                                                                                                                                                                      |                                                                                                                                                                                                                                                                                                          | Discussion |

1  
2  
3  
4  
5  
6  
7  
8  
9  
10  
11  
12  
13  
14  
15  
16  
17  
18  
19  
20  
21  
22  
23  
24  
25  
26  
27  
28  
29  
30  
31  
32  
33  
34  
35  
36  
37  
38  
39  
40  
41  
42  
43  
44  
45  
46  
47

|                                                           |    |                                                                                                                                                               |  |                                                                                                                                                          |                        |
|-----------------------------------------------------------|----|---------------------------------------------------------------------------------------------------------------------------------------------------------------|--|----------------------------------------------------------------------------------------------------------------------------------------------------------|------------------------|
| Generalisability                                          | 21 | Discuss the generalisability (external validity) of the study results                                                                                         |  |                                                                                                                                                          | Discussion             |
| <b>Other Information</b>                                  |    |                                                                                                                                                               |  |                                                                                                                                                          |                        |
| Funding                                                   | 22 | Give the source of funding and the role of the funders for the present study and, if applicable, for the original study on which the present article is based |  |                                                                                                                                                          | Submission information |
| Accessibility of protocol, raw data, and programming code |    | ..                                                                                                                                                            |  | RECORD 22.1: Authors should provide information on how to access any supplemental information such as the study protocol, raw data, or programming code. | Submission information |

\*Reference: Benchimol EI, Smeeth L, Guttman A, Harron K, Moher D, Petersen I, Sørensen HT, von Elm E, Langan SM, the RECORD Working Committee. The REporting of studies Conducted using Observational Routinely-collected health Data (RECORD) Statement. *PLoS Medicine* 2015; in press.

\*Checklist is protected under Creative Commons Attribution ([CC BY](https://creativecommons.org/licenses/by/4.0/)) license.

# BMJ Open

## Comparative effectiveness of first-line biologic monotherapy use in rheumatoid arthritis: a retrospective analysis of the RECOrd-linkage On Rheumatic Disease study on health care administrative databases.

|                                 |                                                                                                                                                                                                                                                                                                                                                                                                                                                                                                                                                                                                            |
|---------------------------------|------------------------------------------------------------------------------------------------------------------------------------------------------------------------------------------------------------------------------------------------------------------------------------------------------------------------------------------------------------------------------------------------------------------------------------------------------------------------------------------------------------------------------------------------------------------------------------------------------------|
| Journal:                        | <i>BMJ Open</i>                                                                                                                                                                                                                                                                                                                                                                                                                                                                                                                                                                                            |
| Manuscript ID                   | bmjopen-2017-021447.R1                                                                                                                                                                                                                                                                                                                                                                                                                                                                                                                                                                                     |
| Article Type:                   | Research                                                                                                                                                                                                                                                                                                                                                                                                                                                                                                                                                                                                   |
| Date Submitted by the Author:   | 15-May-2018                                                                                                                                                                                                                                                                                                                                                                                                                                                                                                                                                                                                |
| Complete List of Authors:       | Silvagni, Ettore; Department of Medical Sciences, Rheumatology Unit, University of Ferrara<br>Bortoluzzi, Alessandra; Department of Medical Sciences, Rheumatology Unit, University of Ferrara<br>Carrara, Greta; Italian Society for Rheumatology (SIR), Epidemiology Unit<br>Zanetti, Anna; Italian Society for Rheumatology (SIR), Epidemiology Unit<br>Govoni, Marcello; Department of Medical Sciences, Rheumatology Unit, University of Ferrara<br>Scirè, Carlo; Department of Medical Sciences, Rheumatology Unit, University of Ferrara; Italian Society for Rheumatology (SIR), Epidemiology Unit |
| <b>Primary Subject Heading</b>: | Rheumatology                                                                                                                                                                                                                                                                                                                                                                                                                                                                                                                                                                                               |
| Secondary Subject Heading:      | Pharmacology and therapeutics                                                                                                                                                                                                                                                                                                                                                                                                                                                                                                                                                                              |
| Keywords:                       | rheumatoid arthritis, biologics, drug persistence, conventional synthetic DMARDs                                                                                                                                                                                                                                                                                                                                                                                                                                                                                                                           |
|                                 |                                                                                                                                                                                                                                                                                                                                                                                                                                                                                                                                                                                                            |

SCHOLARONE™  
Manuscripts



1  
2  
3 **Research Article**  
4

5  
6 **Title**  
7

8 **Comparative effectiveness of first-line biologic monotherapy use in rheumatoid arthritis: a**  
9 **retrospective analysis of the RECORD-linkage On Rheumatic Disease study on health care**  
10 **administrative databases.**  
11  
12

13  
14  
15 **E. Silvagni (MD)<sup>1</sup>, A. Bortoluzzi (MD, PhD)<sup>1</sup>, G. Carrara (Stat)<sup>2</sup>, A. Zanetti (Stat)<sup>2</sup>, M. Govoni**  
16 **(MD)<sup>1</sup>, C.A. Scirè (MD, PhD)<sup>1,2</sup>**  
17  
18

19  
20 Ettore Silvagni (MD), Alessandra Bortoluzzi (MD, PhD), Greta Carrara (Stat), Anna Zanetti (Stat),  
21  
22 Marcello Govoni (MD), Carlo Alberto Scirè (MD, PhD)  
23

24  
25  
26 *1: Department of Medical Sciences, Rheumatology Unit, University of Ferrara, Cona (Ferrara), Italy.*  
27

28  
29 *2: Epidemiology Unit, Italian Society for Rheumatology, Milan, Italy.*  
30

31  
32  
33  
34  
35 **Corresponding author:** Carlo Alberto Scirè, Rheumatology Unit, Department of Medical Sciences,  
36  
37 University of Ferrara, S. Anna Hospital, via A. Moro 8, 44124 Cona (FE), Italy. Telephone: +39-  
38  
39 053223 9097. FAX number: +39-0532 239689. **E-mail of the corresponding author:**  
40  
41 [c.scire@reumatologia.it](mailto:c.scire@reumatologia.it)  
42  
43  
44  
45  
46  
47  
48  
49  
50  
51  
52  
53  
54  
55  
56  
57  
58  
59  
60

## Abstract

### Objective

These analyses aim to comparatively evaluate the persistence on treatment of different biological disease-modifying antirheumatic drugs (bDMARDs) when administered in monotherapy compared to combination with conventional synthetic (cs)DMARDs in rheumatoid arthritis (RA) patients receiving first-line biologics.

### Design

This is a retrospective observational study on Administrative Healthcare Databases.

### Methods

Data were extracted from healthcare databases of the Lombardy Region, Italy (2004-2013), as a part of the RECORD-linkage On Rheumatic Diseases (RECORD) study, on behalf of the Italian Society for Rheumatology (SIR). Analyses included RA patients starting first-line approved course of bDMARDs and evaluated drug survival by using Cox proportional hazard models. Results are presented as hazard ratios (HR) and 95%CI, crude and adjusted for pre-specified confounders (age, sex, disease duration, Charlson Comorbidity Index (CCI), previous infections, use of concomitant glucocorticoids or non-steroidal anti-inflammatory drugs (NSAIDs)).

### Results

4478 RA patients were included (17.84% monotherapy). Etanercept, adalimumab and infliximab were the most prescribed first-line biologics. bDMARD monotherapy was associated with longer disease duration, higher CCI, lower glucocorticoids and NSAIDs use. Compared to monotherapy, combination associated with a lower risk of failure (adjusted HR 0.79, 95%CI 0.72-0.88). Among monotherapies, considering etanercept as reference, adalimumab (1.28, 1.03-1.59) and infliximab (2.41, 1.85-3.15) had higher risk of failure. Concomitant methotrexate (0.78, 0.70-0.87),

1  
2  
3 leflunomide (0.80, 0.65-0.98), or csDMARD combinations (0.77, 0.68-0.87) reduced the risk of  
4  
5 bDMARD withdrawal.

## 6 7 **Conclusion**

8  
9  
10 Adalimumab and infliximab monotherapies show lower retention rate compared with etanercept.  
11  
12 The relatively small number of therapeutic courses different from TNF-inhibitors make more  
13  
14 difficult to achieve conclusive results with other biologics. Concomitant methotrexate, leflunomide  
15  
16 and csDMARD combination associate with longer survival on bDMARD. Our data confirm the  
17  
18 effectiveness of the current practices in the choice of etanercept as first line anti-TNF  
19  
20 monotherapy and strengthen the currently recommended use of bDMARDs in combination with  
21  
22 csDMARDs.  
23  
24  
25  
26  
27  
28  
29  
30  
31  
32  
33  
34  
35  
36  
37  
38  
39  
40  
41  
42  
43  
44  
45  
46  
47  
48  
49  
50  
51  
52  
53  
54  
55  
56  
57  
58  
59  
60

### Strengths and limitations of this study

- This study provides results from administrative databases, following a previous study with the complete validation of classification algorithms for the identification of patients with rheumatoid arthritis (RA) at the population level through healthcare administrative databases.
- This study, as expected by study design, has no loss to follow up and allows the analysis of a large sample of patients.
- Limitations of the RECORD study include the absence of specific disease clinical outcomes, in particular no information are available about disease activity and radiographic progression.

## Introduction

Biological disease modifying antirheumatic drugs (bDMARDs) are recommended in association with non-biological (conventional synthetic) disease-modifying drugs (csDMARDs) in the treatment of rheumatoid arthritis (RA). As stated by recent updated 2016 EULAR recommendations for the management of RA[1], bDMARDs should be combined with a csDMARD because of a superior efficacy of combination therapy. Among bDMARDs, recommendations suggest using tocilizumab (TCZ) when combination is not possible. Not only methotrexate (MTX) is useful in combination therapy, but other csDMARDs can be also considered.

The better performance of bDMARD combination therapy with csDMARDs over bDMARD monotherapy has been clearly established both in terms of efficacy and retention rate. A recent meta-analysis of the Hazard Ratios (HRs) of bDMARDs discontinuation shows a 23% lower risk of drug withdrawal for any cause in patients treated also with csDMARDs[2]. A possible pharmacodynamic explanation is linked to an additive effect in the inhibitory profile of the combined drugs. In particular, differences between biologics exist and MTX plus adalimumab (ADA) inhibits more biological pathways compared to MTX plus TCZ, suggesting a synergistic effect of MTX in immunosuppression which differs across drugs[3]. A pharmacokinetic effect of incremental doses of MTX in enhancing serum concentrations of ADA was also observed[4]. Moreover, the immunogenicity of biologics, in terms of occurrence of anti-drug antibodies, is lower in combination therapy and MTX reduces the incidence of the appearance of such antibodies[5,6]. The effect of csDMARDs other than MTX in reducing immunogenicity of TNF-inhibitors (TNFi) is still unknown. TCZ and etanercept (ETA) share low immunogenicity[7,8]; MTX association did not influence the production of anti-TCZ[9] and anti-abatacept (ABA) autoantibodies and, when autoantibodies occur, they are not associated with adverse events or

1  
2  
3 discontinuation of therapy[10]. Reduction in disability and radiographic progression are also  
4  
5 superior in combination regimens[11].  
6  
7

8 Limited data are available about the best biological treatment choice in real-life when a biologic  
9  
10 monotherapy is necessary for biologic-naïve patients. In clinical practice, contraindications to MTX  
11  
12 or early intolerance to csDMARDs are frequently observed, and clinicians need to start a biologic  
13  
14 monotherapy in these cases; the result is that RA patients are treated with monotherapy nearby in  
15  
16 one third or even more cases[12–16].  
17  
18

19  
20 Differently from randomized controlled trials (RCTs), data from observational studies or registries  
21  
22 explore the utilization of monotherapy in real-life clinical practice[2] and persistence in therapy is  
23  
24 considered a good indirect and composite measure of effectiveness, safety and tolerability,  
25  
26 reflecting the long-term impact on the course of the disease. Data of real-life overall persistence  
27  
28 show that monoclonal TNFi are burdened by a higher risk of drug failure compared to ETA[2].  
29  
30

31 Limited data are available for non-TNFi.  
32  
33

34  
35 Objective of this analysis was to assess, in RA patients receiving first-line approved biological  
36  
37 therapy, the comparative effectiveness (expressed in terms of drug survival) of different bDMARDs  
38  
39 when administered in monotherapy compared with combination therapy, accordingly to real-life  
40  
41 clinical practice and in compliance with local regulatory approvals. Secondary objectives were to  
42  
43 characterize features of patients starting monotherapy and to evaluate the specific effect of MTX  
44  
45 combination therapy compared with other csDMARDs association regimens in determining  
46  
47 persistence of bDMARD co-therapy.  
48  
49

50  
51 To answer these questions, we took advantage by the RECOrd-linkage On Rheumatic Diseases  
52  
53 (RECORD) dataset, including data from administrative health database (AHD) of the Lombardy  
54  
55  
56  
57  
58  
59

1  
2  
3 region (Italy), analysing bDMARDs and concurrent drug exposures of all the first courses of  
4  
5 bDMARDs of RA patients between 2004 and 2013.  
6  
7  
8  
9  
10  
11  
12  
13  
14  
15  
16  
17  
18  
19  
20  
21  
22  
23  
24  
25  
26  
27  
28  
29  
30  
31  
32  
33  
34  
35  
36  
37  
38  
39  
40  
41  
42  
43  
44  
45  
46  
47  
48  
49  
50  
51  
52  
53  
54  
55  
56  
57  
58  
59  
60

For peer review only

## Materials and Methods

### *Study Design and Setting*

This is a retrospective observational study on AHD of Lombardy Region, Italy (>10,000,000 inhabitants). Access to data was granted by the General Directorate of Health for the purpose of the RECORD study, a project promoted by the Italian Society for Rheumatology (SIR) aiming to set up a national surveillance system to monitor the health burden of rheumatic diseases in Italy using AHD. The protocol was approved by the ethical committee of the Pavia University Hospital. Data included were retrieved between 1st of January 2004 and 31st of December 2013.

### *Patient and Public involvement*

This a retrospective study based on AHD; patients were not directly involved in the research.

### *Participants and variables*

The design of the RECORD study includes a database population of patients with RA and 4 age and sex-matched controls from the general population. Patients with RA were identified through co-payment exemption code 006.714.0, based on its previously demonstrated high specificity (96.39%) and high sensitivity (77.08%) for RA[17], in line with other studies following a similar methodology[18,19].

Study population was defined among patients with RA and at least one delivery of first-line approved bDMARDs (abatacept (ABA), adalimumab (ADA), certolizumab (CTZ), etanercept (ETA), golimumab (GOL), infliximab (INF) and tocilizumab (TCZ)). Rituximab (RTX) was excluded due to the local limitation in first-line deliverability of this drug in RA patients. The exposure to non-steroidal anti-inflammatory drugs (NSAIDs), daily mean glucocorticoid (GC) dosage (expressed in terms of prednisone equivalent, mg per day) and to specific csDMARDs (MTX, Leflunomide (LFN),



1  
2  
3 Cyclosporine A (CYA), Hydroxychloroquine (HCQ) or Sulphasalazine (SSZ) was defined by the drug  
4  
5 delivery recorded in the administrative database.  
6  
7

8 Data included demographics (birth date, gender, death date or embarkment, drug delivery  
9  
10 (Anatomic-Therapeutic Chemical, ATC) - code, date of drug delivery, quantity), exemptions  
11  
12 (exemption code, date of exemption), outpatient services (code and date) and hospital discharge  
13  
14 forms including information on beginning and end of hospitalization, International Classification of  
15  
16 Disease, 9th revision, Clinical Modification (ICD-9-CM) diagnoses and Disease Related Group.  
17  
18 Previous bacterial infections were considered if hospitalization for bacterial infection or an  
19  
20 antibiotic treatment course of over 14 days occurred in the previous year[20].  
21  
22  
23  
24

### 25 ***Statistical methods***

26  
27  
28 The primary outcome was persistence with first-line bDMARD, which was defined as the length of  
29  
30 time between drug delivery plus drug coverage. A patient was considered exposed to a specific  
31  
32 treatment from the first prescription of drug until the last one plus 6 months, in order to consider  
33  
34 the coverage period of drug also after its withdrawal, or until the first prescription of the  
35  
36 subsequent drug. Censoring was defined at treatment stop date plus drug coverage or until the  
37  
38 start of a new bDMARD, death or at the end of established follow-up, whichever came first. Drug  
39  
40 persistence in bDMARD therapy was compared using Cox proportional Hazard models. Results  
41  
42 were presented as HR and 95%CI, crude and adjusted for pre-specified confounders (sex, age,  
43  
44 disease duration, Charlson Comorbidity Index (CCI)[21], concomitant use of NSAIDs, GCs average  
45  
46 dosage and previous bacterial infections). A secondary analysis, focused on the role of each  
47  
48 associated csDMARD in bDMARD persistence, was analyzed by the same mechanism (firstly  
49  
50 considering combination biologics as a whole and then investigating the interaction between  
51  
52 different csDMARDs and each bDMARD). A sensitivity analysis was performed to investigate if  
53  
54 different periods of bDMARDs prescription could have influenced persistence data (a distinction  
55  
56  
57  
58  
59  
60

1  
2  
3 was made before and after 31<sup>st</sup> December 2009, according to changes occurred in local bDMARDs  
4  
5 deliverability).

6  
7 All the analyses were performed using the Stata11 software (STATA Corporation, College Station,  
8  
9 Texas, USA) and R statistical Software (Foundation for Statistical Computing, Vienna, Austria).  
10  
11  
12  
13  
14  
15  
16  
17  
18  
19  
20  
21  
22  
23  
24  
25  
26  
27  
28  
29  
30  
31  
32  
33  
34  
35  
36  
37  
38  
39  
40  
41  
42  
43  
44  
45  
46  
47  
48  
49  
50  
51  
52  
53  
54  
55  
56  
57  
58  
59  
60

## Results

### *Study population and Descriptive Data*

A total of 4478 RA patients who had their first-line bDMARD delivery were included (13728 person/time). 3472 were women (77.53 %); mean age (standard deviation, SD) at bDMARD exposure was 55.48 (12.69) years with a modal disease duration of over five years. No missing data nor lost to follow-up were recorded, nor expected by design. A mean (SD) CCI of 1.16 (0.48) was observed (Table 1).

bDMARD monotherapy was administered to 799 patients (17.84%) while 3679 (82.16%) experienced csDMARDs association. Most prescribed bDMARDs were ETA (1787 patients, 39.91%), ADA (1143, 25.52%) and INF (861, 19.23%). ETA was the most prescribed drug out of monotherapy (385 patients, 48.19%) and in combination group (1402 patients, 38.11%) (Table 2).

Among concomitant csDMARD therapy, MTX was the most commonly prescribed (2297 patients had only concurrent MTX, 62.44%); 223 only concurrent LFN (6.06%), 151 concurrent HCQ (4.10%), 43 SSZ (1.17%), 41 CYA (1.11%). 924 patients (25.12%) experienced a combination of different csDMARDs; in this group a total of 827 patients received MTX, 254 LFN, 131 SSZ, 619 HCQ, 116 CYA.

451 bDMARD monotherapies were started before 31<sup>st</sup> December 2009 (252 ETA, 136 ADA, 62 INF, 1 ABA, no TCZ, CTZ and GOL) and 348 after 1<sup>st</sup> January 2010 (133 ETA, 65 ADA, 47 TCZ, 33 ABA, 30 CTZ, 21 GOL and 19 INF).

### *Factors influencing monotherapy*

Monotherapy was associated with longer disease duration, a higher CCI (in particular hepatic and renal disease and heart failure), lower use of GCs and NSAIDs (Table 1).

**Table 1. Clinical and demographic features of the study population including 4478 RA patients and their distribution in bDMARDs mono- and combination therapy.**

| <i>Demographic characteristics</i>      | <i>Study population</i> | <i>Monotherapy (N. 799)</i> | <i>Combination (N 3679)</i> | <i>p</i> |
|-----------------------------------------|-------------------------|-----------------------------|-----------------------------|----------|
| Mean age (SD, years)                    | 55.48 (12.69)           | 54.90 (12.97)               | 55.61 (12.62)               | 0.136    |
| Female, n (%)                           | 3472 (77.53)            | 614 (76.85)                 | 2858 (77.68)                | 0.607    |
| <b>Clinical characteristics</b>         |                         |                             |                             |          |
| Disease duration N (%)                  |                         |                             |                             |          |
| • < 1 years                             | 1028 (22.96)            | 153 (19.15)                 | 875 (23.78)                 |          |
| • > 1 to ≤ 2 years                      | 1106 (24.7)             | 188 (23.53)                 | 918 (24.95)                 | <0.001   |
| • ≥ 3 to ≤ 5 years                      | 1064 (23.76)            | 171 (21.40)                 | 893 (24.27)                 |          |
| • > 5 years                             | 1280 (28.58)            | 287 (35.92)                 | 993 (26.99)                 |          |
| Number of comorbidities = 0 N (%)       | 3941 (88.01)            | 683 (85.48)                 | 3258 (88.56)                |          |
| Number of comorbidities = 1 N (%)       | 416 (9.29)              | 80 (10.01)                  | 336 (9.13)                  | 0.004    |
| Number of comorbidities = 2 N (%)       | 105 (2.34)              | 30 (3.75)                   | 75 (2.04)                   |          |
| Number of comorbidities ≥ 3 N (%)       | 16 (0.36)               | 6 (0.75)                    | 10 (0.27)                   |          |
| Charlson Comorbidity Index *, Mean (SD) | 1.16 (0.48)             | 1.22 (0.60)                 | 1.15 (0.45)                 | 0.009    |
| CHD, N (%)                              | 66 (1.47)               | 16 (2.00)                   | 50 (1.36)                   | 0.193    |
| Heart Failure, N (%)                    | 12 (0.27)               | 5 (0.63)                    | 7 (0.19)                    | 0.047    |
| Vascular Pathology, N (%)               | 10 (0.22)               | 4 (0.50)                    | 6 (0.16)                    | 0.086    |
| Dementia, N (%)                         | 1 (0.02)                | 1 (0.13)                    | 0 (0.00)                    | 0.178    |
| COPD, N (%)                             | 49 (1.09)               | 11 (1.38)                   | 38 (1.03)                   | 0.451    |
| Mild Hepatic disease **, N (%)          | 73 (1.63)               | 24 (3.00)                   | 49 (1.33)                   | 0.002    |
| Diabetes, N (%)                         | 276 (6.16)              | 41 (5.13)                   | 235 (6.39)                  | 0.195    |
| Renal Disease, N (%)                    | 32 (0.71)               | 18 (2.25)                   | 14 (0.38)                   | <0.001   |
| Neoplasm **, N (%)                      | 67 (1.50)               | 16 (2.00)                   | 51 (1.39)                   | 0.198    |
| Leukemia / Lymphoma, N (%)              | 1 (0.02)                | 1 (0.13)                    | 0 (0.00)                    | 0.178    |
| Previous Infections, N (%)              | 822 (18.36)             | 140 (17.52)                 | 682 (18.54)                 | 0.501    |
| Concomitant NSAIDs, N (%)               | 3386 (75.61)            | 485 (60.70)                 | 2901 (78.85)                | <0.001   |
| Concomitant GCs, N (%)                  | 3045 (68.00)            | 428 (53.57)                 | 2617 (71.13)                | <0.001   |
| GCs dose (mg/day), mean (SD)            | 2.23 (3.08)             | 1.85 (3.32)                 | 2.31 (3.01)                 | <0.001   |

CHD: Coronary Heart Disease; COPD: Chronic Obstructive Pulmonary Disease; AIDS: Acquired Immunodeficiency Syndrome.

\* Diabetes with end-organ damage, AIDS, cerebrovascular disease, peptic ulcer and hemiplegia are not shown due to absence of cases in monotherapy group.

\*\* Severe hepatic disease and metastatic neoplasms are not shown due to absence of cases in both groups.

**Table 2. Distribution of different bDMARDs in mono- and combination therapy with csDMARDs**

| <i>bDMARDs</i> | <i>Study population</i> | <i>Monotherapy (N. 799)</i> | <i>Combination (N 3679)</i> |
|----------------|-------------------------|-----------------------------|-----------------------------|
| ABA N (%)      | 189 (4.22)              | 34 (4.26)                   | 155 (4.21)                  |
| ADA N (%)      | 1143 (25.52)            | 201 (25.16)                 | 942 (25.60)                 |
| CTZ N (%)      | 156 (3.48)              | 30 (3.75)                   | 126 (3.42)                  |
| ETA N (%)      | 1787 (39.91)            | 385 (48.19)                 | 1402 (38.11)                |
| GOL N (%)      | 151 (3.37)              | 21 (2.63)                   | 130 (3.53)                  |
| INF N (%)      | 861 (19.23)             | 81 (10.14)                  | 780 (21.20)                 |
| TCZ N (%)      | 191 (4.27)              | 47 (5.88)                   | 144 (3.91)                  |

### ***Risk of bDMARD failure***

Compared to monotherapy, combination with at least one csDMARD was associated with a lower risk of drug failure (crude HR 0.77, 95%CI 0.69-0.85; adjusted HR 0.79, 95%CI 0.72-0.88). Among patients in bDMARD-monotherapy, considering ETA as reference, the adjusted HR for bDMARD failure was 1.28 for ADA (95%CI 1.03-1.59) and 2.41 for INF (95%CI 1.85-3.15) (Figure 1); ABA monotherapy was associated with a reduced - but not statistically significant - risk of failure, while TCZ was almost equal to ETA. Otherwise, among combination therapies, only INF was significantly inferior compared with ETA monotherapy. The risk of failure evaluated for the other bDMARDs was not statistically different from ETA monotherapy.

### ***Influence of different csDMARDs in persistence in bDMARD treatment***

Considering specific combination therapy and taking bDMARD monotherapy as reference, concurrent csDMARDs significantly reduced the risk of bDMARD withdrawal (adjusted HR 0.78 for MTX alone, 95%CI 0.70-0.87; HR 0.80 for LFN alone, 95%CI 0.65-0.98; HR 0.77 for combination of different csDMARDs, 95%CI 0.68-0.87) (Figure 2), while no statistical significant improvement in drug survival was observed for SSZ, HCQ or CYA when used as the single associated csDMARD.

The analysis of different csDMARDs in determining persistence of different bDMARD treatment showed that MTX alone or in combination with other csDMARDs positively influenced persistence in INF treatment, while other associations between csDMARDs and bDMARDs did not significantly modify the concomitant biologic drug survival.

### ***Sensitivity analysis***

After stratification in different periods of time (before and after 31<sup>st</sup> December 2009) an increase in the previous reported risk of drug failure for INF was observed (HR 2.72, 95%CI 1.51-4.90). The risk of ADA failure remains elevated compared to ETA monotherapy, but differences according to the time period were no longer significant (HR 1.17, 95%CI 0.70-1.96); the risk of failure for other

1  
2  
3 bDMARDs remains not significantly different from ETA (Supplementary file 1). A sub-analysis of  
4  
5 the patients receiving ADA monotherapy after 1<sup>st</sup> January 2010 showed that in this group a  
6  
7 proportional higher number of males was present ( $p=0.004$ ), with longer disease duration  
8  
9 ( $p<0.001$ ) and higher CCI ( $p=0.018$ ).  
10  
11  
12  
13  
14  
15  
16  
17  
18  
19  
20  
21  
22  
23  
24  
25  
26  
27  
28  
29  
30  
31  
32  
33  
34  
35  
36  
37  
38  
39  
40  
41  
42  
43  
44  
45  
46  
47  
48  
49  
50  
51  
52  
53  
54  
55  
56  
57  
58  
59  
60

## Discussion

Using bDMARDs as monotherapy in clinical settings is a common practice for RA patients and recognised by health authorities although current guidelines recommend combining them with csDMARDs. The aims of this study were to describe persistence and factors associated with starting biologic monotherapy in a real-world setting. In our study, monotherapy was common and observed in approximately 1 out of 5 biologic-naive patients with RA initiating a biologic agent (17.8%). In previous biologics registries and claims database studies, 12–39% of patients were taking biologics as monotherapy[22–24].

From a practical perspective, it seems even more important to investigate those factors which may drive prescribing monotherapy. Indeed, bDMARDs monotherapy could be representative of a subgroup of patients with a more difficult disease management[25]. It has been reported that older patients, with longer disease duration and multiple comorbidities, lower body mass index (BMI) and higher disease activity show higher probability to undergo monotherapy[16,22,25,26]. Concomitant use of glucocorticoids predicts higher bDMARD discontinuation, reflecting a much severe course of the disease[2,23]. Accordingly, in our retrospective study based on AHD, we have observed a significant association between monotherapy and longer disease duration and a higher number of comorbidities. As expected, hepatic and renal diseases were the most limiting factors for csDMARDs association. NSAIDs and GCs were negatively associated with monotherapy, likely reflecting contraindication to these drugs due to concomitant comorbidities.

As demonstrated by the majority of published real-life studies and RCTs, our study confirms that bDMARD risk of failure is significantly lower in combination with csDMARDs (21% lower risk of drug withdrawal compared to monotherapy). Concerning monotherapy, in a Swiss study of retention rate which analyses data from Swiss Clinical Quality Management Registry (SCQM-RA) between 2004 and 2013[25], 27% of all biologics therapeutic courses was initiated as



1  
2  
3 monotherapy (the higher percentage of monotherapy was for CTZ with 46%; 35% ETA; 35% TCZ;  
4  
5 29% ABA; 26% ADA; 23% RTX; 17% GOL and 14% INF) and a further 13% experienced a transient  
6  
7 phase of monotherapy overtime; discontinuation of bDMARD occurred in 63% (1545/2453) and  
8  
9 the adjusted HR for discontinuation of biologic monotherapy versus combination was 1.15 (95%CI  
10  
11 1.03-1.30,  $p=0.018$ ), although differences between the two groups were relatively modest.  
12  
13  
14 Treatment failure was influenced not only by the type of bDMARD but even by gender, number of  
15  
16 previous bDMARDs, year of initiation of the receiving drug, seropositivity, disease duration and  
17  
18 activity. TNFi strongly impact these data, being historically the first bDMARD entered in clinical  
19  
20 practice and accounting for about 80% of therapeutic courses; therefore, conclusive results are  
21  
22 still lacking. Overall, the type of bDMARD is certainly one of the most important factors influencing  
23  
24 persistence, and INF monotherapy is burdened by the higher rate of withdrawal[2,23,27]. Globally,  
25  
26 monoclonal antibodies against TNF-alfa share higher discontinuation compared to ETA[2,28];  
27  
28 whether the global higher immunogenicity of monoclonal antibodies is strictly responsible for this  
29  
30 difference is still matter of debate. In an observational study, Kristensen et al.[29] stand out a  
31  
32 higher adherence in first-line ETA-treated patients compared to INF; concomitant MTX was  
33  
34 associated with better persistence in both groups but significantly higher for ETA. In a 12-years  
35  
36 retention rate study of first-line TNFi, Favalli et al.[30] demonstrated a higher risk of drug failure  
37  
38 for ADA (HR 2.89, 95%CI 2.2-3.78) and INF (HR 2.56, 95%CI 1.92-3.4) compared to ETA, similarly to  
39  
40 what is reported by a French multicentric study by Frazier-Mironer[31] and the GISEA registry[32];  
41  
42 MTX-users in combination with biologic shared higher retention rate compared with TNFi  
43  
44 monotherapy (HR 1.48, 95%CI 1.18-1.86). Jorgensen et al.[23] analysed 775 pts in the Danish  
45  
46 registry and showed that persistence in monotherapy was significantly higher for all biologics  
47  
48 compared to INF (HR of withdrawal 2.53 for INF compared to other bDMARDs, 95%CI 1.70-3.77,  $p$   
49  
50  $<0.001$ ) and these features were independent of the number of previous biologics. In German  
51  
52 RABBIT registry, a longer persistence was found in combination therapy with TNFi but remission  
53  
54  
55  
56  
57  
58  
59

1  
2  
3 rates were not significantly different from monotherapy group[14]. The south Swedish SSATG  
4  
5 registry[33] evaluated differences in biologics monotherapy persistence in different biologics  
6  
7 courses over 6 years and highlighted a significant difference among bDMARDs with highest  
8  
9 retention rates observed for RTX and ETA. In RADIUS registry[34], which analyzed different efficacy  
10  
11 between ETA, INF and csDMARDs therapy, patients receiving either ETA plus MTX (adjusted OR  
12  
13 1.29, 95%CI 1.09-1.52,  $p<0,01$ ) or ETA monotherapy (OR 1.23, 95% CI 1.02-1.47,  $p<0,05$ ) were  
14  
15 more likely to achieve a modified ACR20-response at 12 months than patients receiving MTX  
16  
17 alone, INF plus MTX or INF alone; persistence in therapy however was higher for INF plus MTX  
18  
19 (71% of INF group persisted in therapy after 12 months; versus 69% of ETA monotherapy, 67% INF  
20  
21 alone and 61% ETA plus MTX); noteworthy cost of the therapy was claimed as a significant cause  
22  
23 of discontinuation of biologic therapy in this registry (up to 6% of ETA monotherapy changed  
24  
25 treatment due to high costs). The ACT-iON observational study[35] explored different persistence  
26  
27 rates among first-line TNFi and TCZ and showed a better persistence for TCZ compared to TNFi as a  
28  
29 whole; a comparison between first-line monotherapies was not possible due to the low number of  
30  
31 cases. Our data are in keeping with current literature and show a lower persistence for first-line  
32  
33 monoclonal TNFi (ADA and INF) monotherapy compared with ETA monotherapy, suggesting that  
34  
35 these bDMARDs should be avoided when a TNFi monotherapy is thought to be necessary.  
36  
37  
38  
39  
40

41  
42 Data from RTCs confirm this tendency among TNFi, either in terms of retention rate as well for  
43  
44 radiological outcomes, but long term head-to-head comparative trials among different bDMARDs  
45  
46 specifically designed to test this outcome are lacking. With regard to non-TNFi, data about a real  
47  
48 superiority of combination therapy compared to monotherapy are controversial[7,26]. A pan-  
49  
50 European analysis of registries including nearly 3400 pts showed that retention of ABA was not  
51  
52 influenced by csDMARDs co-therapy[7]. TCZ has gained the reputation to be the best bDMARD to  
53  
54 utilize in monotherapy and the only one with a satisfactory durability[12,13,36] and cost-  
55  
56  
57  
58  
59

1  
2  
3 effectiveness[37]. However, also for this drug, association strategy has demonstrated to be useful  
4  
5 in clinical trials giving some advantages when compared with monotherapy. In ACT-RAY trial, after  
6  
7 2 years, a difference in radiographic progression was observed favoring combination regimen with  
8  
9 MTX[38] and, in a recent post-hoc sub-analysis of ACT-SURE study, concomitant csDMARDs helped  
10  
11 to achieve low disease activity earlier than in TCZ monotherapy[39], similarly to what  
12  
13 demonstrated by Kaneko et al. in SURPRISE study[40]. Conversely, other studies did not show  
14  
15 particular advantages in terms of clinical efficacy of TCZ combination therapy over  
16  
17 monotherapy[41,42]. In ADACTA study[43] TCZ monotherapy reduced significantly disease activity  
18  
19 score (DAS) and Clinical Disease Activity Index (CDAI) compared to ADA monotherapy after 24  
20  
21 weeks, in a head-to-head comparison between monotherapies. Our study confirms a similar  
22  
23 persistence rate between non-TNFi monotherapy compared to combination, but the small size of  
24  
25 our sample and the calendar-period of the analysis does not allow a conclusive remark.  
26  
27  
28

29  
30  
31 Our data show that either MTX or LFN or combination of different csDMARDs significantly increase  
32  
33 bDMARDs persistence rate, while CYA is associated with a higher (but not significant) rate of drug  
34  
35 failure. Previous reports on the benefits of combining different csDMARDs with bDMARDs have  
36  
37 shown contrasting results; Soliman et al.[16] explored the role of different csDMARDs intervention  
38  
39 in biological persistence in a real-life study which evaluated persistence in over 10,000 pts from a  
40  
41 British registry and stated that MTX combination was linked to a better persistence of the first  
42  
43 TNFi when compared to no csDMARDs, LFN or SSZ but the best overall persistence was seen  
44  
45 among pts receiving TNFi in combination to MTX and either SSZ or HCQ or both, in line with our  
46  
47 results. Similarly, Manders et al. found a similar persistence rate in TNFi plus MTX group compared  
48  
49 to TNFi plus MTX plus others[44]. De Stefano et al.[45] reported a similar efficacy and safety  
50  
51 profile for TNFi combined with either MTX or LFN in Early RA, but univocal data for LFN  
52  
53 combination to bDMARDs are lacking and limited by the high number of associations with INF[46].  
54  
55  
56  
57  
58  
59

1  
2  
3 Conversely, Kristensen et al.[29] demonstrated that concomitant MTX, but not other csDMARDs,  
4  
5 was associated with a better persistence with first-line ETA or INF therapy, but significantly higher  
6  
7 for ETA. A positive influence in terms of efficacy has been observed for LFN combined with RTX in  
8  
9 GERINIS study[47] and in CERERRA collaboration[48].  
10

11  
12 When stratifying by calendar year - subclasses, after the introduction of other bDMARDs in current  
13  
14 recommended therapeutic approach, the risk of failure for INF monotherapy slightly increased,  
15  
16 while ADA monotherapy became not statistically different from ETA. Higher number of  
17  
18 comorbidities and longer disease duration in this subgroup could reflect the selection of a  
19  
20 particular subset of patients for whom an acceptance of a sub-optimal control of disease activity  
21  
22 has been made, despite a real efficacy of the drug. Afterwards, the reduction of the sample size  
23  
24 after this stratification could have influenced the results as well as the prescription attitude of  
25  
26 bDMARDs might have changed during the period of analysis. In fact, as shown by literature[2,25],  
27  
28 the year of treatment could have influenced bDMARD retention rate, since rheumatologists are  
29  
30 more prone to change biologics if more alternatives are available[27], although data about this  
31  
32 issue are controversial[49].  
33  
34  
35  
36  
37  
38

39 Our study has some limitations. The different burden of prescribed bDMARDs (being ETA, ADA and  
40  
41 INF the most prescribed ones) could have influenced our results; to this regard, GOL, CTZ and non-  
42  
43 TNFi associated with a lower prescription rate and RTX was excluded due to the local limitation in  
44  
45 first-line deliverability. This limitation makes conclusions not generalizable for all biological agents.  
46  
47 We adjusted for pre-specified confounders but confounding of unmeasured factors could not be  
48  
49 excluded (50), for example other comorbidities different from those included in CCI, previous  
50  
51 csDMARDs treatment history, changed treatment behaviour overtime with different GCs and  
52  
53 NSAIDs utilization schemes or specific musculoskeletal disease or patients-related characteristics  
54  
55 (radiological features, concomitant osteoarthritis, crystal arthropathies or fibromyalgia).  
56  
57  
58  
59

1  
2  
3 Furthermore, the design of the study could not differentiate between patients starting  
4 monotherapy “ab initio” and those reaching such monotherapy by a “step-down” process; despite  
5 this behavior accounts for only a small proportion[25], the overall prevalence could have been  
6 under-recognized due to specific design of trials and “real-life” databases[16]; anyway,  
7 characterizing such a population was out of the scope of our study which focuses only on the first  
8 group (“ab initio” monotherapies). Other limitations are intrinsic in the AHD-based design of the  
9 study, in particular lack of control of data collected for non-clinical purposes and misclassification  
10 biases; furthermore clinical outcomes are lacking (absence of disease activity and radiological  
11 outcome data; specific causes of bDMARD failure or monotherapy prescription, such as patients’  
12 or physicians’ preferences[22]; possible alternative therapeutic schemes, including spacing of the  
13 bDMARD scheduled administration; different dosages of csDMARDs co-therapy)[50]. AHD reflect  
14 drug dispensing instead that the exact specialists’ “prescription” habit or the real patients’  
15 adherence, thus resulting in a difference between the rate of prescribed monotherapies and the  
16 rate of drug acquisition and use. Anyway, AHD are commonly considered a good instrument to  
17 estimate drug prescription and exposure[51] and our data are in line with results from registries  
18 regarding monotherapy use in RA.

19  
20  
21 However, the RECORD study has some relevant strengths: its large sample size, allowing the  
22 examination of the effect of concomitant bDMARDs and csDMARDs, and the completeness of data  
23 without loss at follow-up. This is, to our knowledge, the first AHD-based study investigating  
24 different persistence rates in first-line biological monotherapies combining all bDMARDs approved  
25 as “first-line” treatment.

26  
27  
28 In conclusion, our study supports the currently recommended use of bDMARDs in combination  
29 with csDMARDs, underlining a higher risk of drug withdrawal for TNFi monotherapy compared  
30 with combination and suggesting that, among bDMARDs, ETA should be preferred over INF - and

1  
2  
3 to lesser extent ADA - when a first-line monotherapy is necessary. Despite univocal conclusions  
4  
5 are not possible for non-TNFi, our results strengthen the positive influence of MTX, LFN or  
6  
7 combination of csDMARDs in improving bDMARDs persistence.  
8  
9  
10  
11  
12  
13  
14  
15  
16  
17  
18  
19  
20  
21  
22  
23  
24  
25  
26  
27  
28  
29  
30  
31  
32  
33  
34  
35  
36  
37  
38  
39  
40  
41  
42  
43  
44  
45  
46  
47  
48  
49  
50  
51  
52  
53  
54  
55  
56  
57  
58  
59  
60

For peer review only

1  
2  
3 **Figure Legends**  
4

5  
6 **Figure 1**  
7

8  
9 Crude and adjusted HR and 95%CI for bDMARD failure when administered in first-line  
10  
11 monotherapy and in combination with csDMARDs.  
12  
13

14  
15  
16  
17 **Figure 2**  
18

19  
20 Crude and adjusted HR and 95%CI for different csDMARDs in determining the risk of fist-line  
21  
22 bDMARD failure.  
23  
24  
25  
26  
27  
28  
29  
30  
31  
32  
33  
34  
35  
36  
37  
38  
39  
40  
41  
42  
43  
44  
45  
46  
47  
48  
49  
50  
51  
52  
53  
54  
55  
56  
57  
58  
59  
60

**Competing interests:**

E. Silvagni; G. Carrara; A. Zanetti; C.A. Scirè: none to declare. A. Bortoluzzi: Sanofi, Alfa-Wasserman. M. Govoni: Pfizer, Abbvie, MSD, Roche, BMS, Sanofi, Lilly, Novartis, Celgene: fees for sponsored lectures and/or participation in advisory boards.

**Data sharing information:**

No additional information are available.

**Funding:**

Study supported by the Italian Society for Rheumatology (SIR) as part of the Epidemiology Unit development program.

**Authorship Criteria:**

Substantial contributions to study conception and design: ES, AB, GC, AZ, MG, CAS

Substantial contributions to acquisition of data: GC, ES, AZ, CAS

Substantial contributions to analysis and interpretation of data: ES, AB, GC, CAS

Drafting the article or revising it critically for important intellectual content: ES, AB, GC, AZ, MG, CAS

Final approval of the version of the article to be published: ES, AB, GC, AZ, MG, CAS



1  
2  
3 Agreement to be accountable for all aspects of the work in ensuring that questions related to the  
4  
5 accuracy or integrity of any part of the work are appropriately investigated and resolved: ES, AB,  
6  
7 GC, AZ, MG, CAS  
8  
9

10 No other potential author who fulfils the ICMJE Recommendations criteria has been excluded as  
11  
12 an author.  
13  
14  
15  
16  
17  
18  
19  
20  
21  
22  
23  
24  
25  
26  
27  
28  
29  
30  
31  
32  
33  
34  
35  
36  
37  
38  
39  
40  
41  
42  
43  
44  
45  
46  
47  
48  
49  
50  
51  
52  
53  
54  
55  
56  
57  
58  
59  
60

## References

- 1 Smolen JS, Landewé R, Bijlsma J, *et al.* EULAR recommendations for the management of rheumatoid arthritis with synthetic and biological disease-modifying antirheumatic drugs: 2016 update. *Ann Rheum Dis* 2017;**76**:960–77. doi:10.1136/annrheumdis-2016-210715
- 2 Souto A, Maneiro JR, Gómez-Reino JJ. Rate of discontinuation and drug survival of biologic therapies in rheumatoid arthritis: a systematic review and meta-analysis of drug registries and health care databases. *Rheumatol Oxf Engl* 2016;**55**:523–34. doi:10.1093/rheumatology/kev374
- 3 O’Mahony A, Berg EL, John MR, *et al.* THU0526 Tocilizumab is Less Dependent than Adalimumab on Supplementary Effects of Methotrexate for Immunoregulation: A Biomap® Profiling Study. *Ann Rheum Dis* 2014;**73**:365–365. doi:10.1136/annrheumdis-2014-eular.3386
- 4 Burmester G-R, Kivitz AJ, Kupper H, *et al.* Efficacy and safety of ascending methotrexate dose in combination with adalimumab: the randomised CONCERTO trial. *Ann Rheum Dis* 2015;**74**:1037–44. doi:10.1136/annrheumdis-2013-204769
- 5 Jani M, Barton A, Warren RB, *et al.* The role of DMARDs in reducing the immunogenicity of TNF inhibitors in chronic inflammatory diseases. *Rheumatol Oxf Engl* 2014;**53**:213–22. doi:10.1093/rheumatology/ket260
- 6 Garcês S, Demengeot J, Benito-Garcia E. The immunogenicity of anti-TNF therapy in immune-mediated inflammatory diseases: a systematic review of the literature with a meta-analysis. *Ann Rheum Dis* 2013;**72**:1947–55. doi:10.1136/annrheumdis-2012-202220
- 7 Choy E, Aletaha D, Behrens F, *et al.* Monotherapy with biologic disease-modifying anti-rheumatic drugs in rheumatoid arthritis. *Rheumatology* 2016;:kew271. doi:10.1093/rheumatology/kew271
- 8 Burmester GR, Choy E, Kivitz A, *et al.* Low immunogenicity of tocilizumab in patients with rheumatoid arthritis. *Ann Rheum Dis* 2017;**76**:1078–85. doi:10.1136/annrheumdis-2016-210297
- 9 Dougados M, Kissel K, Conaghan PG, *et al.* Clinical, radiographic and immunogenic effects after 1 year of tocilizumab-based treatment strategies in rheumatoid arthritis: the ACT-RAY study. *Ann Rheum Dis* 2014;**73**:803–9. doi:10.1136/annrheumdis-2013-204761
- 10 Nash P, Nayiager S, Genovese MC, *et al.* Immunogenicity, safety, and efficacy of abatacept administered subcutaneously with or without background methotrexate in patients with rheumatoid arthritis: results from a phase III, international, multicenter, parallel-arm, open-label study. *Arthritis Care Res* 2013;**65**:718–28. doi:10.1002/acr.21876
- 11 van der Heijde D, Breedveld FC, Kavanaugh A, *et al.* Disease activity, physical function, and radiographic progression after longterm therapy with adalimumab plus methotrexate: 5-year results of PREMIER. *J Rheumatol* 2010;**37**:2237–46. doi:10.3899/jrheum.100208
- 12 Mehta N, Schneider LK, McCardell E. Rheumatoid Arthritis: Selecting Monotherapy Versus Combination Therapy. *J Clin Rheumatol Pract Rep Rheum Musculoskelet Dis* Published Online First: 18 January 2017. doi:10.1097/RHU.0000000000000410
- 13 Emery P, Sebba A, Huizinga TWJ. Biologic and oral disease-modifying antirheumatic drug monotherapy in rheumatoid arthritis. *Ann Rheum Dis* 2013;**72**:1897–904. doi:10.1136/annrheumdis-2013-203485

- 1  
2  
3 14 Listing J, Strangfeld A, Rau R, *et al.* Clinical and functional remission: even though biologics are superior  
4 to conventional DMARDs overall success rates remain low—results from RABBIT, the German biologics  
5 register. *Arthritis Res Ther* 2006;**8**:R66. doi:10.1186/ar1933  
6  
7 15 Lee SJ, Chang H, Yazici Y, *et al.* Utilization trends of tumor necrosis factor inhibitors among patients  
8 with rheumatoid arthritis in a United States observational cohort study. *J Rheumatol* 2009;**36**:1611–7.  
9 doi:10.3899/jrheum.080889  
10  
11 16 Soliman MM, Ashcroft DM, Watson KD, *et al.* Impact of concomitant use of DMARDs on the persistence  
12 with anti-TNF therapies in patients with rheumatoid arthritis: results from the British Society for  
13 Rheumatology Biologics Register. *Ann Rheum Dis* 2011;**70**:583–9. doi:10.1136/ard.2010.139774  
14  
15 17 Carrara G, Scirè CA, Zambon A, *et al.* A validation study of a new classification algorithm to identify  
16 rheumatoid arthritis using administrative health databases: case-control and cohort diagnostic  
17 accuracy studies. Results from the RECOrd linkage On Rheumatic Diseases study of the Italian Society  
18 for Rheumatology. *BMJ Open* 2015;**5**:e006029. doi:10.1136/bmjopen-2014-006029  
19  
20 18 Generali E, Carrara G, Selmi C, *et al.* Comparison of the risks of hospitalisation for cardiovascular events  
21 in patients with rheumatoid arthritis treated with tocilizumab and etanercept. *ClinExpRheumatol*  
22 2017;;in Press.  
23  
24 19 Caprioli M, Carrara G, Sakellariou G, *et al.* Influence of aromatase inhibitors therapy on the occurrence  
25 of rheumatoid arthritis in women with breast cancer: results from a large population-based study of  
26 the Italian Society for Rheumatology. *RMD Open* 2017;**3**. doi:10.1136/rmdopen-2017-000523  
27  
28 20 Barber C, Lacaille D, Fortin PR. Systematic review of validation studies of the use of administrative data  
29 to identify serious infections. *Arthritis Care Res* 2013;**65**:1343–57. doi:10.1002/acr.21959  
30  
31 21 Deyo RA, Cherkin DC, Ciol MA. Adapting a clinical comorbidity index for use with ICD-9-CM  
32 administrative databases. *J Clin Epidemiol* 1992;**45**:613–9. doi:10.1016/0895-4356(92)90133-8  
33  
34 22 Pappas DA, Reed GW, Saunders K, *et al.* Characteristics Associated with Biologic Monotherapy Use in  
35 Biologic-Naive Patients with Rheumatoid Arthritis in a US Registry Population. *Rheumatol Ther*  
36 2015;**2**:85–96. doi:10.1007/s40744-015-0008-9  
37  
38 23 Jørgensen TS, Kristensen LE, Christensen R, *et al.* Effectiveness and drug adherence of biologic  
39 monotherapy in routine care of patients with rheumatoid arthritis: a cohort study of patients  
40 registered in the Danish biologics registry. *Rheumatol Oxf Engl* 2015;**54**:2156–65.  
41 doi:10.1093/rheumatology/kev216  
42  
43 24 Heiberg MS, Koldingsnes W, Mikkelsen K, *et al.* The comparative one-year performance of anti-tumor  
44 necrosis factor  $\alpha$  drugs in patients with rheumatoid arthritis, psoriatic arthritis, and ankylosing  
45 spondylitis: Results from a longitudinal, observational, multicenter study. *Arthritis Care Res*  
46 2008;**59**:234–40. doi:10.1002/art.23333  
47  
48 25 Gabay C, Riek M, Scherer A, *et al.* Effectiveness of biologic DMARDs in monotherapy versus in  
49 combination with synthetic DMARDs in rheumatoid arthritis: data from the Swiss Clinical Quality  
50 Management Registry. *Rheumatol Oxf Engl* 2015;**54**:1664–72. doi:10.1093/rheumatology/kev019  
51  
52 26 Zhang J, Xie F, Delzell E, *et al.* Impact of Biologic Agents With and Without Concomitant Methotrexate  
53 and at Reduced Doses in Older Rheumatoid Arthritis Patients. *Arthritis Care Res* 2015;**67**:624–32.  
54 doi:10.1002/acr.22510  
55  
56  
57  
58  
59  
60

- 1  
2  
3 27 Scirè CA, Caporali R, Sarzi-Puttini P, *et al.* Drug survival of the first course of anti-TNF agents in patients  
4 with rheumatoid arthritis and seronegative spondyloarthritis: analysis from the MonitorNet database.  
5 *Clin Exp Rheumatol* 2013;**31**:857–63.
- 6  
7 28 Orme ME, Macgilchrist KS, Mitchell S, *et al.* Systematic review and network meta-analysis of  
8 combination and monotherapy treatments in disease-modifying antirheumatic drug-experienced  
9 patients with rheumatoid arthritis: analysis of American College of Rheumatology criteria scores 20, 50,  
10 and 70. *Biol Targets Ther* 2012;**6**:429–64. doi:10.2147/BTT.S36707
- 11  
12 29 Kristensen LE, Saxne T, Nilsson J-A, *et al.* Impact of concomitant DMARD therapy on adherence to  
13 treatment with etanercept and infliximab in rheumatoid arthritis. Results from a six-year observational  
14 study in southern Sweden. *Arthritis Res Ther* 2006;**8**:R174. doi:10.1186/ar2084
- 15  
16 30 Favalli EG, Pregnotato F, Biggioggero M, *et al.* Twelve-Year Retention Rate of First-Line Tumor Necrosis  
17 Factor Inhibitors in Rheumatoid Arthritis: Real-Life Data From a Local Registry. *Arthritis Care Res*  
18 2016;**68**:432–9. doi:10.1002/acr.22788
- 19  
20 31 Frazier-Mironer A, Dougados M, Mariette X, *et al.* Retention rates of adalimumab, etanercept and  
21 infliximab as first and second-line biotherapy in patients with rheumatoid arthritis in daily practice. *Jt*  
22 *Bone Spine Rev Rhum* 2014;**81**:352–9. doi:10.1016/j.jbspin.2014.02.014
- 23  
24 32 Iannone F, Gremese E, Atzeni F, *et al.* Longterm retention of tumor necrosis factor- $\alpha$  inhibitor therapy  
25 in a large italian cohort of patients with rheumatoid arthritis from the GISEA registry: an appraisal of  
26 predictors. *J Rheumatol* 2012;**39**:1179–84. doi:10.3899/jrheum.111125
- 27  
28 33 Jørgensen TS, Turesson C, Kapetanovic M, *et al.* EQ-5D utility, response and drug survival in rheumatoid  
29 arthritis patients on biologic monotherapy: A prospective observational study of patients registered in  
30 the south Swedish SSATG registry. *PLoS One* 2017;**12**:e0169946. doi:10.1371/journal.pone.0169946
- 31  
32 34 Weaver AL, Lautzenheiser RL, Schiff MH, *et al.* Real-world effectiveness of select biologic and DMARD  
33 monotherapy and combination therapy in the treatment of rheumatoid arthritis: results from the  
34 RADIUS observational registry. *Curr Med Res Opin* 2006;**22**:185–98. doi:10.1185/030079905X65510
- 35  
36 35 Choy EH, Bernasconi C, Aassi M, *et al.* Treatment of Rheumatoid Arthritis With Anti-Tumor Necrosis  
37 Factor or Tocilizumab Therapy as First Biologic Agent in a Global Comparative Observational Study.  
38 *Arthritis Care Res* 2017;**69**:1484–94. doi:10.1002/acr.23303
- 39  
40 36 Buckley F, Finckh A, Huizinga TWJ, *et al.* Comparative Efficacy of Novel DMARDs as Monotherapy and in  
41 Combination with Methotrexate in Rheumatoid Arthritis Patients with Inadequate Response to  
42 Conventional DMARDs: A Network Meta-Analysis. *J Manag Care Spec Pharm* 2015;**21**:409–23.  
43 doi:10.18553/jmcp.2015.21.5.409
- 44  
45 37 Batticciotto A, Ravasio R, Riva M, *et al.* Efficacy and Treatment Costs of Monotherapy with bDMARDs in  
46 the Treatment of Rheumatoid Arthritis in Patients Intolerant to or Inappropriate to Continue Treatment  
47 with Methotrexate. *Adv Ther* 2016;**33**:1360–73. doi:10.1007/s12325-016-0372-z
- 48  
49 38 Huizinga TWJ, Conaghan PG, Martin-Mola E, *et al.* Clinical and radiographic outcomes at 2 years and  
50 the effect of tocilizumab discontinuation following sustained remission in the second and third year of  
51 the ACT-RAY study. *Ann Rheum Dis* 2015;**74**:35–43. doi:10.1136/annrheumdis-2014-205752
- 52  
53 39 Mueller RB, Graninger W, Sidiropoulos P, *et al.* Median time to low disease activity is shorter in  
54 tocilizumab combination therapy with csDMARDs as compared to tocilizumab monotherapy in patients  
55 with active rheumatoid arthritis and inadequate responses to csDMARDs and/or TNF inhibitors: sub-  
56 analysis of the Swiss and Austrian patients from the ACT-SURE study. *Clin Rheumatol* 2017;**;**1–6.  
57 doi:10.1007/s10067-017-3779-2
- 58  
59

- 1  
2  
3 40 Kaneko Y, Atsumi T, Tanaka Y, *et al.* Comparison of adding tocilizumab to methotrexate with switching  
4 to tocilizumab in patients with rheumatoid arthritis with inadequate response to methotrexate: 52-  
5 week results from a prospective, randomised, controlled study (SURPRISE study). *Ann Rheum Dis*  
6 2016;**75**:1917–23. doi:10.1136/annrheumdis-2015-208426  
7  
8 41 Weinblatt ME, Kremer J, Cush J, *et al.* Tocilizumab as monotherapy or in combination with nonbiologic  
9 disease-modifying antirheumatic drugs: twenty-four-week results of an open-label, clinical practice  
10 study. *Arthritis Care Res* 2013;**65**:362–71. doi:10.1002/acr.21847  
11  
12 42 Alfonso-Cristancho R, Armstrong N, Arjunji R, *et al.* Comparative effectiveness of biologics for the  
13 management of rheumatoid arthritis: systematic review and network meta-analysis. *Clin Rheumatol*  
14 2017;**36**:25–34. doi:10.1007/s10067-016-3435-2  
15  
16 43 Gabay C, Emery P, van Vollenhoven R, *et al.* Tocilizumab monotherapy versus adalimumab  
17 monotherapy for treatment of rheumatoid arthritis (ADACTA): a randomised, double-blind, controlled  
18 phase 4 trial. *Lancet Lond Engl* 2013;**381**:1541–50. doi:10.1016/S0140-6736(13)60250-0  
19  
20 44 Manders SHM, Kievit W, Jansen TLTA, *et al.* Effectiveness of Tumor Necrosis Factor Inhibitors in  
21 Combination with Various csDMARD in the Treatment of Rheumatoid Arthritis: Data from the DREAM  
22 Registry. *J Rheumatol* 2016;**43**:1787–94. doi:10.3899/jrheum.151014  
23  
24 45 De Stefano R, Frati E, Nargi F, *et al.* Comparison of combination therapies in the treatment of  
25 rheumatoid arthritis: leflunomide-anti-TNF-alpha versus methotrexate-anti-TNF-alpha. *Clin Rheumatol*  
26 2010;**29**:517–24. doi:10.1007/s10067-009-1349-y  
27  
28 46 Flendrie M, Creemers MCW, Welsing PMJ, *et al.* The influence of previous and concomitant  
29 leflunomide on the efficacy and safety of infliximab therapy in patients with rheumatoid arthritis; a  
30 longitudinal observational study. *Rheumatology* 2005;**44**:472–8. doi:10.1093/rheumatology/keh508  
31  
32 47 Wendler J, Burmester GR, Sørensen H, *et al.* Rituximab in patients with rheumatoid arthritis in routine  
33 practice (GERINIS): six-year results from a prospective, multicentre, non-interventional study in 2,484  
34 patients. *Arthritis Res Ther* 2014;**16**:R80. doi:10.1186/ar4521  
35  
36 48 Chatzidionysiou K, Lie E, Nasonov E, *et al.* Effectiveness of disease-modifying antirheumatic drug co-  
37 therapy with methotrexate and leflunomide in rituximab-treated rheumatoid arthritis patients: results  
38 of a 1-year follow-up study from the CERERRA collaboration. *Ann Rheum Dis* 2012;**71**:374–7.  
39 doi:10.1136/annrheumdis-2011-200003  
40  
41 49 Acurcio FA, Machado MAA, Moura CS, *et al.* Medication Persistence of Disease-Modifying  
42 Antirheumatic Drugs and Anti-Tumor Necrosis Factor Agents in a Cohort of Patients With Rheumatoid  
43 Arthritis in Brazil. *Arthritis Care Res* 2016;**68**:1489–96. doi:10.1002/acr.22840  
44  
45 50 Krishnan E, Fries JF. Measuring effectiveness of drugs in observational databanks: promises and perils.  
46 *Arthritis Res Ther* 2004;**6**:41–4. doi:10.1186/ar1151  
47  
48 51 Cadarette SM, Wong L. An Introduction to Health Care Administrative Data. *Can J Hosp Pharm*  
49 2015;**68**:232–7.  
50  
51  
52  
53  
54  
55  
56  
57  
58  
59  
60

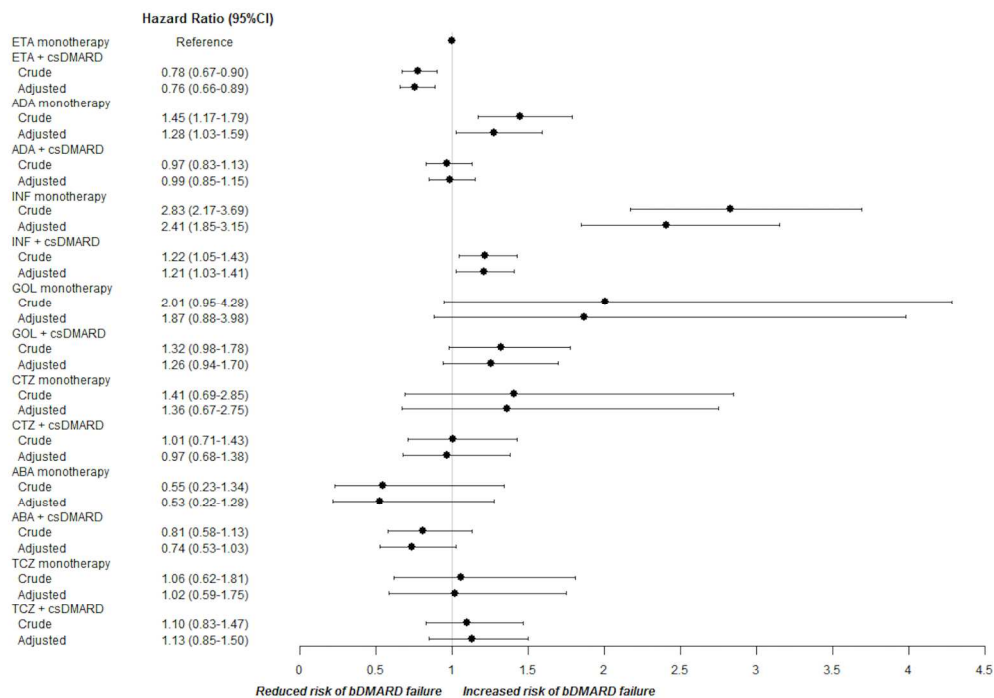

Figure 1  
Crude and adjusted HR and 95%CI for bDMARD failure when administered in first-line monotherapy and in combination with csDMARDs.

163x114mm (300 x 300 DPI)

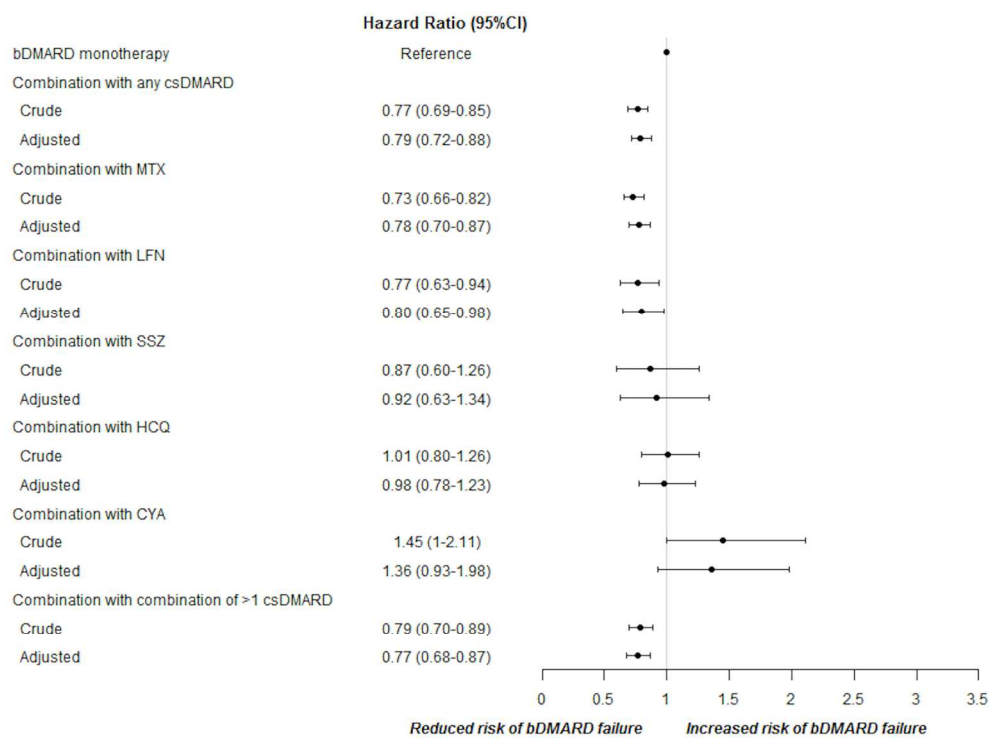

Figure 2  
Crude and adjusted HR and 95%CI for different csDMARDs in determining the risk of fist-line bDMARD failure.

152x114mm (300 x 300 DPI)

**Supplementary file 1. Risk of drug failure of different bDMARDs monotherapy before and after 31<sup>st</sup> december 2009.**

| <b>bDMARD monotherapy</b>      | <b><i>Adjusted HR</i></b><br><b><i>(95%CI) before 31<sup>st</sup></i></b><br><b><i>december 2009</i></b> | <b><i>p</i></b> | <b><i>Adjusted HR</i></b><br><b><i>(95%CI) after 1<sup>st</sup></i></b><br><b><i>January</i></b><br><b><i>2010</i></b> | <b><i>p</i></b> |
|--------------------------------|----------------------------------------------------------------------------------------------------------|-----------------|------------------------------------------------------------------------------------------------------------------------|-----------------|
| ETA monotherapy (385 patients) | 1 (ref)                                                                                                  |                 | 1 (ref)                                                                                                                |                 |
| ADA monotherapy (201 patients) | 1.40 (1.09 – 1.78)                                                                                       | 0.008           | 1.17 (0.70-1.96)                                                                                                       | 0.554           |
| INF monotherapy (81 patients)  | 2.20 (1.59 – 3.05)                                                                                       | <0.001          | 2.72 (1.51 – 4.90)                                                                                                     | 0.001           |
| GOL monotherapy (21 patients)  | <i>Not applicable*</i>                                                                                   |                 | 1.38 (0.60 – 3.18)                                                                                                     | 0.447           |
| CTZ monotherapy (30 patients)  | <i>Not applicable*</i>                                                                                   |                 | 1.08 (0.51 – 2.29)                                                                                                     | 0.843           |
| ABA monotherapy (34 patients)  | <i>Not applicable*</i>                                                                                   |                 | 0.46 (0.18 – 1.15)                                                                                                     | 0.097           |
| TCZ monotherapy (47 patients)  | <i>Not applicable*</i>                                                                                   |                 | 0.82 (0.45 – 1.48)                                                                                                     | 0.504           |

\* *Not applicable: based on the changes occurred in local approved first-line bDMARD deliverability.*



**The RECORD statement – checklist of items, extended from the STROBE statement, that should be reported in observational studies using routinely collected health data.**

|                           | <b>Item No.</b> | <b>STROBE items</b>                                                                                                                                                                        | <b>Location in manuscript where items are reported</b> | <b>RECORD items</b>                                                                                                                                                                                                                                                                                                                                                                                                                 | <b>Location in manuscript where items are reported</b> |
|---------------------------|-----------------|--------------------------------------------------------------------------------------------------------------------------------------------------------------------------------------------|--------------------------------------------------------|-------------------------------------------------------------------------------------------------------------------------------------------------------------------------------------------------------------------------------------------------------------------------------------------------------------------------------------------------------------------------------------------------------------------------------------|--------------------------------------------------------|
| <b>Title and abstract</b> |                 |                                                                                                                                                                                            |                                                        |                                                                                                                                                                                                                                                                                                                                                                                                                                     |                                                        |
|                           | 1               | (a) Indicate the study’s design with a commonly used term in the title or the abstract (b) Provide in the abstract an informative and balanced summary of what was done and what was found |                                                        | RECORD 1.1: The type of data used should be specified in the title or abstract. When possible, the name of the databases used should be included.<br>RECORD 1.2: If applicable, the geographic region and timeframe within which the study took place should be reported in the title or abstract.<br>RECORD 1.3: If linkage between databases was conducted for the study, this should be clearly stated in the title or abstract. | Title, Abstract, page 1-2                              |
| <b>Introduction</b>       |                 |                                                                                                                                                                                            |                                                        |                                                                                                                                                                                                                                                                                                                                                                                                                                     |                                                        |
| Background rationale      | 2               | Explain the scientific background and rationale for the investigation being reported                                                                                                       |                                                        |                                                                                                                                                                                                                                                                                                                                                                                                                                     | Introduction, page 5-6                                 |
| Objectives                | 3               | State specific objectives, including any prespecified hypotheses                                                                                                                           |                                                        |                                                                                                                                                                                                                                                                                                                                                                                                                                     | Introduction, page 6                                   |
| <b>Methods</b>            |                 |                                                                                                                                                                                            |                                                        |                                                                                                                                                                                                                                                                                                                                                                                                                                     |                                                        |
| Study Design              | 4               | Present key elements of study design early in the paper                                                                                                                                    |                                                        |                                                                                                                                                                                                                                                                                                                                                                                                                                     | Methods, page 8                                        |
| Setting                   | 5               | Describe the setting, locations, and relevant dates, including periods of recruitment,                                                                                                     |                                                        |                                                                                                                                                                                                                                                                                                                                                                                                                                     | Methods, page 8                                        |

|                              |   |                                                                                                                                                                                                                                                                                                                                                                                                                                                                                                                                                                                                                                                                                          |  |                                                                                                                                                                                                                                                                                                                                                                                                                                                                                                                                                                                                                                                                                                      |                   |
|------------------------------|---|------------------------------------------------------------------------------------------------------------------------------------------------------------------------------------------------------------------------------------------------------------------------------------------------------------------------------------------------------------------------------------------------------------------------------------------------------------------------------------------------------------------------------------------------------------------------------------------------------------------------------------------------------------------------------------------|--|------------------------------------------------------------------------------------------------------------------------------------------------------------------------------------------------------------------------------------------------------------------------------------------------------------------------------------------------------------------------------------------------------------------------------------------------------------------------------------------------------------------------------------------------------------------------------------------------------------------------------------------------------------------------------------------------------|-------------------|
|                              |   | exposure, follow-up, and data collection                                                                                                                                                                                                                                                                                                                                                                                                                                                                                                                                                                                                                                                 |  |                                                                                                                                                                                                                                                                                                                                                                                                                                                                                                                                                                                                                                                                                                      |                   |
| Participants                 | 6 | <p>a) Cohort study - Give the eligibility criteria, and the sources and methods of selection of participants. Describe methods of follow-up</p> <p>Case-control study - Give the eligibility criteria, and the sources and methods of case ascertainment and control selection. Give the rationale for the choice of cases and controls</p> <p>Cross-sectional study - Give the eligibility criteria, and the sources and methods of selection of participants</p> <p>(b) Cohort study - For matched studies, give matching criteria and number of exposed and unexposed</p> <p>Case-control study - For matched studies, give matching criteria and the number of controls per case</p> |  | <p>RECORD 6.1: The methods of study population selection (such as codes or algorithms used to identify subjects) should be listed in detail. If this is not possible, an explanation should be provided.</p> <p>RECORD 6.2: Any validation studies of the codes or algorithms used to select the population should be referenced. If validation was conducted for this study and not published elsewhere, detailed methods and results should be provided.</p> <p>RECORD 6.3: If the study involved linkage of databases, consider use of a flow diagram or other graphical display to demonstrate the data linkage process, including the number of individuals with linked data at each stage.</p> | Methods, page 8   |
| Variables                    | 7 | Clearly define all outcomes, exposures, predictors, potential confounders, and effect modifiers. Give diagnostic criteria, if applicable.                                                                                                                                                                                                                                                                                                                                                                                                                                                                                                                                                |  | RECORD 7.1: A complete list of codes and algorithms used to classify exposures, outcomes, confounders, and effect modifiers should be provided. If these cannot be reported, an explanation should be provided.                                                                                                                                                                                                                                                                                                                                                                                                                                                                                      | Methods, page 9   |
| Data sources/<br>measurement | 8 | For each variable of interest, give sources of data and details of methods of assessment                                                                                                                                                                                                                                                                                                                                                                                                                                                                                                                                                                                                 |  |                                                                                                                                                                                                                                                                                                                                                                                                                                                                                                                                                                                                                                                                                                      | Methods, page 8-9 |

1  
2  
3  
4  
5  
6  
7  
8  
9  
10  
11  
12  
13  
14  
15  
16  
17  
18  
19  
20  
21  
22  
23  
24  
25  
26  
27  
28  
29  
30  
31  
32  
33  
34  
35  
36  
37  
38  
39  
40  
41  
42  
43  
44  
45  
46  
47

|                        |    |                                                                                                                                                                                                                                                                                                                                                                                                                                                                                                                                                 |  |  |                        |
|------------------------|----|-------------------------------------------------------------------------------------------------------------------------------------------------------------------------------------------------------------------------------------------------------------------------------------------------------------------------------------------------------------------------------------------------------------------------------------------------------------------------------------------------------------------------------------------------|--|--|------------------------|
|                        |    | (measurement).<br>Describe comparability of assessment methods if there is more than one group                                                                                                                                                                                                                                                                                                                                                                                                                                                  |  |  |                        |
| Bias                   | 9  | Describe any efforts to address potential sources of bias                                                                                                                                                                                                                                                                                                                                                                                                                                                                                       |  |  | Discussion, page 20-21 |
| Study size             | 10 | Explain how the study size was arrived at                                                                                                                                                                                                                                                                                                                                                                                                                                                                                                       |  |  | N/A                    |
| Quantitative variables | 11 | Explain how quantitative variables were handled in the analyses. If applicable, describe which groupings were chosen, and why                                                                                                                                                                                                                                                                                                                                                                                                                   |  |  | Methods, page 9        |
| Statistical methods    | 12 | (a) Describe all statistical methods, including those used to control for confounding<br>(b) Describe any methods used to examine subgroups and interactions<br>(c) Explain how missing data were addressed<br>(d) Cohort study - If applicable, explain how loss to follow-up was addressed<br>Case-control study - If applicable, explain how matching of cases and controls was addressed<br>Cross-sectional study - If applicable, describe analytical methods taking account of sampling strategy<br>(e) Describe any sensitivity analyses |  |  | Methods, page 9        |

|                                  |    |                                                                                                                                                                                                                                                                                                               |  |                                                                                                                                                                                                                                                                                                           |                  |
|----------------------------------|----|---------------------------------------------------------------------------------------------------------------------------------------------------------------------------------------------------------------------------------------------------------------------------------------------------------------|--|-----------------------------------------------------------------------------------------------------------------------------------------------------------------------------------------------------------------------------------------------------------------------------------------------------------|------------------|
| Data access and cleaning methods |    | ..                                                                                                                                                                                                                                                                                                            |  | RECORD 12.1: Authors should describe the extent to which the investigators had access to the database population used to create the study population.<br>RECORD 12.2: Authors should provide information on the data cleaning methods used in the study.                                                  | Methods, page 8  |
| Linkage                          |    | ..                                                                                                                                                                                                                                                                                                            |  | RECORD 12.3: State whether the study included person-level, institutional-level, or other data linkage across two or more databases. The methods of linkage and methods of linkage quality evaluation should be provided.                                                                                 | Methods, page 8  |
| <b>Results</b>                   |    |                                                                                                                                                                                                                                                                                                               |  |                                                                                                                                                                                                                                                                                                           |                  |
| Participants                     | 13 | (a) Report the numbers of individuals at each stage of the study (e.g., numbers potentially eligible, examined for eligibility, confirmed eligible, included in the study, completing follow-up, and analysed)<br>(b) Give reasons for non-participation at each stage.<br>(c) Consider use of a flow diagram |  | RECORD 13.1: Describe in detail the selection of the persons included in the study (i.e., study population selection) including filtering based on data quality, data availability and linkage. The selection of included persons can be described in the text and/or by means of the study flow diagram. | Results, page 11 |
| Descriptive data                 | 14 | (a) Give characteristics of study participants (e.g., demographic, clinical, social) and information on exposures and potential confounders<br>(b) Indicate the number of participants with missing data for each variable of interest                                                                        |  |                                                                                                                                                                                                                                                                                                           | Results, page 11 |

|                   |    |                                                                                                                                                                                                                                                                                                                                                                                                                 |  |  |                     |
|-------------------|----|-----------------------------------------------------------------------------------------------------------------------------------------------------------------------------------------------------------------------------------------------------------------------------------------------------------------------------------------------------------------------------------------------------------------|--|--|---------------------|
|                   |    | (c) Cohort study - summarise follow-up time (e.g., average and total amount)                                                                                                                                                                                                                                                                                                                                    |  |  |                     |
| Outcome data      | 15 | Cohort study - Report numbers of outcome events or summary measures over time<br>Case-control study - Report numbers in each exposure category, or summary measures of exposure<br>Cross-sectional study - Report numbers of outcome events or summary measures                                                                                                                                                 |  |  | Results, page 14    |
| Main results      | 16 | (a) Give unadjusted estimates and, if applicable, confounder-adjusted estimates and their precision (e.g., 95% confidence interval). Make clear which confounders were adjusted for and why they were included<br>(b) Report category boundaries when continuous variables were categorized<br>(c) If relevant, consider translating estimates of relative risk into absolute risk for a meaningful time period |  |  | Results, page 14    |
| Other analyses    | 17 | Report other analyses done— e.g., analyses of subgroups and interactions, and sensitivity analyses                                                                                                                                                                                                                                                                                                              |  |  | Results, page 11-14 |
| <b>Discussion</b> |    |                                                                                                                                                                                                                                                                                                                                                                                                                 |  |  |                     |
| Key results       | 18 | Summarise key results with                                                                                                                                                                                                                                                                                                                                                                                      |  |  | Discussion, page 16 |

|                                                           |    |                                                                                                                                                                            |  |                                                                                                                                                                                                                                                                                                          |                        |
|-----------------------------------------------------------|----|----------------------------------------------------------------------------------------------------------------------------------------------------------------------------|--|----------------------------------------------------------------------------------------------------------------------------------------------------------------------------------------------------------------------------------------------------------------------------------------------------------|------------------------|
|                                                           |    | reference to study objectives                                                                                                                                              |  |                                                                                                                                                                                                                                                                                                          |                        |
| Limitations                                               | 19 | Discuss limitations of the study, taking into account sources of potential bias or imprecision. Discuss both direction and magnitude of any potential bias                 |  | RECORD 19.1: Discuss the implications of using data that were not created or collected to answer the specific research question(s). Include discussion of misclassification bias, unmeasured confounding, missing data, and changing eligibility over time, as they pertain to the study being reported. | Discussion, page 20-21 |
| Interpretation                                            | 20 | Give a cautious overall interpretation of results considering objectives, limitations, multiplicity of analyses, results from similar studies, and other relevant evidence |  |                                                                                                                                                                                                                                                                                                          | Discussion, page 16-20 |
| Generalisability                                          | 21 | Discuss the generalisability (external validity) of the study results                                                                                                      |  |                                                                                                                                                                                                                                                                                                          | Discussion, page 16-22 |
| <b>Other Information</b>                                  |    |                                                                                                                                                                            |  |                                                                                                                                                                                                                                                                                                          |                        |
| Funding                                                   | 22 | Give the source of funding and the role of the funders for the present study and, if applicable, for the original study on which the present article is based              |  |                                                                                                                                                                                                                                                                                                          | Submission information |
| Accessibility of protocol, raw data, and programming code |    | ..                                                                                                                                                                         |  | RECORD 22.1: Authors should provide information on how to access any supplemental information such as the study protocol, raw data, or programming code.                                                                                                                                                 | Submission information |

\*Reference: Benchimol EI, Smeeth L, Guttman A, Harron K, Moher D, Petersen I, Sørensen HT, von Elm E, Langan SM, the RECORD Working Committee. The REporting of studies Conducted using Observational Routinely-collected health Data (RECORD) Statement. PLoS Medicine 2015.

\*Checklist is protected under Creative Commons Attribution (CC BY) license.
