# Supplementary material for: Comparative effectiveness of first-line biological monotherapy use in rheumatoid arthritis: a retrospective analysis of the RECord-linkage On Rheumatic Diseases study on health care administrative databases
Source: PubMed Central journal article supplement — BMJ Open. 2018 Sep 11;8(9):e021447. doi: 10.1136/bmjopen-2017-021447 (PMC6144331; doi:10.1136/bmjopen-2017-021447), 2018-09-11
Supplement: bmjopen-2017-021447supp001.pdf [file bmjopen-2017-021447supp001.pdf]

**Supplementary file 1. Risk of drug failure of different bDMARDs monotherapy before and after 31<sup>st</sup> december 2009.**

| <b>bDMARD monotherapy</b>      | <b><i>Adjusted HR</i></b><br><b><i>(95%CI) before 31<sup>st</sup></i></b><br><b><i>december 2009</i></b> | <b><i>p</i></b> | <b><i>Adjusted HR</i></b><br><b><i>(95%CI) after 1<sup>st</sup></i></b><br><b><i>January</i></b><br><b><i>2010</i></b> | <b><i>p</i></b> |
|--------------------------------|----------------------------------------------------------------------------------------------------------|-----------------|------------------------------------------------------------------------------------------------------------------------|-----------------|
| ETA monotherapy (385 patients) | 1 (ref)                                                                                                  |                 | 1 (ref)                                                                                                                |                 |
| ADA monotherapy (201 patients) | 1.40 (1.09 – 1.78)                                                                                       | 0.008           | 1.17 (0.70-1.96)                                                                                                       | 0.554           |
| INF monotherapy (81 patients)  | 2.20 (1.59 – 3.05)                                                                                       | <0.001          | 2.72 (1.51 – 4.90)                                                                                                     | 0.001           |
| GOL monotherapy (21 patients)  | <i>Not applicable*</i>                                                                                   |                 | 1.38 (0.60 – 3.18)                                                                                                     | 0.447           |
| CTZ monotherapy (30 patients)  | <i>Not applicable*</i>                                                                                   |                 | 1.08 (0.51 – 2.29)                                                                                                     | 0.843           |
| ABA monotherapy (34 patients)  | <i>Not applicable*</i>                                                                                   |                 | 0.46 (0.18 – 1.15)                                                                                                     | 0.097           |
| TCZ monotherapy (47 patients)  | <i>Not applicable*</i>                                                                                   |                 | 0.82 (0.45 – 1.48)                                                                                                     | 0.504           |

\* *Not applicable: based on the changes occurred in local approved first-line bDMARD deliverability.*
